# Supplementary material for: A two-dimensional Stockwell Transform for gravity wave analysis of AIRS measurements
Source: Copernicus journal article supplement (doi:10.5194/amt-2015-383), 2016-01-18
Supplement: Supplementary file [file amt-2015-383-AC2-supplement.pdf]

# **Authors' response to Anonymous Reviewer #2 : A two-dimensional Stockwell Transform for gravity wave analysis of AIRS measurements *doi:10.5914/amt-2015-383***

Neil P Hindley<sup>1</sup>

<sup>1</sup>Centre for Space, Atmosphere and Ocean Science, University of Bath, UK

*Correspondence to:* Neil Hindley (n.hindley@bath.ac.uk)

We would like to thank the anonymous reviewer for their very helpful suggestions. These will greatly contribute to the improvement of the manuscript, and we have applied all changes as requested.

A LatexDiff document, denoting all changes to the manuscript, is attached at the end of these responses.

## **5 A note to reviewers: Correction in original submission**

In the first submission of this manuscript, we introduced a new spectral windowing function for the two-dimensional Stockwell transform: the elliptical window. In Sect. 4.4 of this first submission (p.11, l.20) we stated that this new window is only partially valid for use in the Stockwell transform.

We have since been able to show that this new window is in fact fully valid for use in the Stockwell transform. We did this by  
10 showing that the integral of its spatial form is equal to unity. A short proof of this is provided in an Appendix in the revised manuscript. This greatly strengthens the integrity of the study and will be of use to others in the future. The results of the study are unchanged.

Accordingly, we would like to add D. Andrew S. Rees, at the University of Bath, to the list of authors of this manuscript for his contribution to this correction.

15 In the revised manuscript, we refer to the elliptical window as the Elliptic-Bessel window, which more appropriately describes its wavenumber and spatial forms. The Sinc window, which was mentioned only in passing and not used in the study, is now redundant and has been removed from the revised manuscript. We have updated Figure 3 to reflect this.

## Specific comments and authors' responses

- 5 (1) **Reviewer's comment:** *p.3 l.20: Momentum flux estimation from temperature fluctuations is not easy. Most methods such as shown in (15) use an assumption that the wave fields are monochromatic. Vertical wavelengths are hardly estimated from nadir view observations as discussed in this manuscript, too. There is also an observational window problem: AIRS cannot observe waves with short vertical wavelengths and/or very long horizontal wavelengths.*
- **Authors' response:** We agree that limitations remain, which are discussed in more detail in Section 5. We have added a short acknowledgement of this to the paragraph in question.
- 10 (2) **Reviewer's comment:** *p.4, l.23: A reference or a short description of derivation for (5) should be useful (e.g. convolution theorem).*
- **Authors' response:** Reference and short description added. The full derivation of Eqn. 5, which does indeed involve the convolution theorem, can be found in (Stockwell, 1999, their Section 3.5.1), and applications of this spectral formulation can also be found in Mansinha et al. (1997a, b); Pinnegar and Mansinha (2003); Stockwell (2007) and others.
- 15 (3) **Reviewer's comment:** *Suggestion: briefly introduce the expression “voice” by stating that this denotes a specific wavenumber or frequency out of a discrete set.*
- **Authors' response:** Added as suggested in Section 2. The “voice” expression is now used throughout the manuscript, where applicable.
- 20 (4) **Reviewer's comment:** *p.5 l.1:  $H(t) \rightarrow h(t)$*
- **Authors' response:** Fixed.
- 25 (5) **Reviewer's comment:** *p.14, l.1: For AIRS observation, the angle between along-track direction and across-track direction is not necessarily  $90^\circ$ . Thus the formula for absolute horizontal wavelengths is not correct. This formula should be written using the angle between the directions.*
- **Authors' response:** We do not quite agree:
- In the frame of reference of the AIRS instrument aboard the Aqua satellite, viewing at the nadir the angle between the along-track direction and each cross-track scan is always  $90^\circ$ , or as close as physically possible. It is only when the measurement swath is projected onto the ellipsoidal surface of the earth that this angle can vary towards the edges of the swath and may not necessarily be  $90^\circ$  as the reviewer suggests.
- 30

However, the geolocation information contained within the AIRS measurements allows us, to a good approximation, to interpolate this irregularly-sampled projection back into a regular and orthogonal grid, as viewed by the AIRS instrument. In this grid, the along-track and cross-track directions are thus orthogonal, and the equation on p.14 is valid for measuring projection of these waves in the AIRS granule.

We do acknowledge however that some other uncertainties may arise. Near to the poles for example, small “warping” effects may occur where the rotation of the earth under the Aqua satellite during a scan is non-negligible, such that the image is not instantaneous for the geographic region it views.

(6) **Reviewer’s comment:** *p.14, l.15: Please specify underlying assumptions for (15). This formula is valide for monochromatic and hydrostatic gravity waves which are not influenced by the Coriolis effect.*

– **Authors’ response:** As requested, we have now specified the assumptions for Eqn. 15 in Section 5.3. We have added the text: “Eqn. 15 assumes the mid-frequency approximation (Fritts and Alexander, 2003, their Sect. 2.1), which is valid for large portion of the observable gravity wave spectrum. For these waves,  $m^2 \ll (k^2 + l^2)$  and Coriolis effects are neglible, as is the case for nearly all waves measured here due to the size of the AIRS beam footprint (Hoffmann et al., 2014) and the vertical weighting function of the  $667.77 \text{ cm}^{-1}$  channel (Alexander and Barnet, 2007). When compared with momentum fluxes calculated without making the mid-frequency approximation, Ern et al. (2004) found discrepancies typically not exceeding around 10%. ”

## References

- Alexander, M. J. and Barnett, C.: Using satellite observations to constrain parameterizations of gravity wave effects for global models., *J. Atmos. Sci.*, 64, 1652–1665, doi:10.1175/JAS3897.1, 2007.
- Ern, M., Preusse, P., Alexander, M. J., and Warner, C. D.: Absolute values of gravity wave momentum flux derived from satellite data, *J. Geophys. Res.*, 109, D20 103, doi:10.1029/2004JD004752, 2004.
- Fritts, D. C. and Alexander, M. J.: Gravity wave dynamics and effects in the middle atmosphere, *Reviews of Geophysics*, 41, 1003, doi:10.1029/2001RG000106, 2003.
- Hoffmann, L., Alexander, M. J., Clerbaux, C., Grimsdell, A. W., Meyer, C. I., Roessler, T., and Tournier, B.: Intercomparison of stratospheric gravity wave observations with AIRS and IASI, *Atmos. Meas. Tech.*, 7, 4517–4537, doi:10.5194/amt-7-4517-2014, 2014.
- Mansinha, L., Stockwell, R. G., and Lowe, R. P.: Pattern analysis with two-dimensional spectral localisation: Applications of two-dimensional S transforms, *Physica A.*, 239, 286–295, doi:10.1016/S0378-4371(96)00487-6, Proceedings of the International Conference on Pattern Formation in Fluids and Materials CPiP 96 (Collective Phenomena in Physics 96), University of Western Ontario, London, Canada, June 13-15, 1996, 1997a.
- Mansinha, L., Stockwell, R. G., Lowe, R. P., Eramian, M., and Schincariol, R. A.: Local S-spectrum analysis of 1-D and 2-D data, *Physics of the Earth and Planetary Interiors*, 103, 329–336, doi:10.1016/S0031-9201(97)00047-2, Conference on Geonomy in honor of Professor J A Jacobs, Edinburgh, Scotland, June 03-04, 1996, 1997b.
- Pinnegar, C. R. and Mansinha, L.: The S-transform with windows of arbitrary and varying shape, *Geophysics*, 68, 381–385, doi:10.1190/1.1543223, 2003.
- Stockwell, R. G.: "S-Transform Analysis of Gravity Wave Activity from a Small Scale Network of Airglow Imagers", Ph.D. thesis, "University of Western Ontario", 1999.
- Stockwell, R. G.: A basis for efficient representation of the S-transform, *Digital Signal Processing*, 17, 371 – 393, doi:http://dx.doi.org/10.1016/j.dsp.2006.04.006, 2007.

# A two-dimensional Stockwell Transform for gravity wave analysis of AIRS measurements

Neil P. Hindley<sup>1</sup>, Nathan D. Smith<sup>1</sup>, Corwin J. Wright<sup>1</sup>, D. Andrew S. Rees<sup>2</sup>, and Nicholas J. Mitchell<sup>1</sup>

<sup>1</sup>Centre for Space, Atmosphere and Ocean Science, University of Bath, UK

<sup>2</sup>Department of Mechanical Engineering, University of Bath, UK

Correspondence to: Neil Hindley (n.hindley@bath.ac.uk)

**Abstract.** Gravity waves ~~play a critical~~ (GWs) play a crucial role in the dynamics of the ~~middle atmosphere due to their ability to transport earth's atmosphere.~~ These waves couple lower, middle and upper atmospheric layers by transporting and depositing energy and momentum from their sources to great heights. The accurate parametrization of ~~gravity-wave~~ GW momentum flux is of key importance to general circulation models. ~~For the last but requires accurate measurement of GW properties, which has proved challenging.~~ For more than a decade, the nadir-viewing Atmospheric Infrared Sounder (AIRS) aboard NASA's Aqua satellite has made global, two-dimensional (2-D) measurements of stratospheric radiances in which ~~gravity-waves~~ GWs can be detected. ~~Current methods for gravity-wave~~ However, one problem with current one-dimensional methods for GW analysis of these data ~~can introduce is that they can introduce significant~~ unwanted biases. Here, we present a new analysis method ~~that resolves this problem.~~ Our method uses a 2-D Stockwell transform (2DST) to ~~determine gravity-wave measure~~ GW amplitudes, horizontal wavelengths and directions ~~in both directions of propagation using both the along-track and cross-track dimensions simultaneously.~~ We ~~demonstrate that our method can accurately recover horizontal wavelengths and directions from first test~~ our new method and demonstrate that it can accurately measure GW properties in a specified wave field. We ~~show that the use of an elliptical spectral windowing function then show that by using a new elliptical spectral window~~ in the 2DST, in place of ~~a Gaussian, the traditional Gaussian, we~~ can dramatically improve the recovery of wave amplitude. ~~We measure momentum flux in two granules of AIRS measurements in over the standard approach.~~ We then use our improved method to measure GW properties and momentum fluxes in AIRS measurements over two regions known to be intense hot spots of ~~gravity-wave~~ GW activity: (i) the Drake Passage/Antarctic Peninsula and (ii) the isolated mountainous island of South Georgia. ~~We show that our~~ The significance of our new 2DST method ~~provides improved spatial localisation of key gravity-wave properties over is that it provides more accurate, unbiased and better localised measurements of key GW properties compared to most~~ current methods. ~~The added flexibility offered by alternative spectral windowing functions and scaling parameters~~ the scaling parameter and our new spectral window presented here extend the usefulness of our 2DST method to other areas of geophysical data analysis and beyond.

## 1 Introduction

Gravity waves are a vital component of the atmospheric system. These propagating mesoscale disturbances can transport energy and momentum from their source regions to great heights, ~~where they~~. They thus are a key driving mechanism in the dynamics of the middle atmosphere through drag and diffusion processes (e.g. Fritts and Alexander, 2003, and references therein).

5 The accurate parametrization of unresolved gravity waves in global climate models (GCMs) has proven to be a long-standing problem in the modelling community. ~~The~~ One example of this is the “cold pole” bias (Butchart et al., 2011), ~~suffered~~ by nearly all GCMs, which has been suggested to be due to a deficiency of resolved and parametrized gravity wave drag near 60°S. One reason for this is that these gravity wave parametrizations continue to be poorly constrained by observations (Alexander et al., 2010). The accurate measurement of gravity wave properties is thus critical for the development of the next and current  
10 generation of climate models. In the last decade, satellite-based remote-sensing has greatly increased our capability to make gravity wave observations on a global scale, but large discrepancies between observed and modelled fluxes still remain (Geller et al., 2013). This highlights the need for ~~ever~~ more accurate global and regional gravity wave measurements.

The Atmospheric Infrared Sounder (AIRS) (Aumann et al., 2003) is a nadir-sounding spectral imager on board the Aqua satellite, launched in 2002. Part of the A-Train satellite constellation, AIRS scans the atmosphere over the range  $\pm 49^\circ$  from the  
15 nadir of the satellite in a 90 pixel ( $\sim 1800$  km) wide swath, using 2378 infrared channels along a sun-synchronous polar orbit. This continuous swath is archived in granules, usually 135 pixels ( $\sim 2400$  km) along-track. Stratospheric gravity waves can be detected in these granules as radiance perturbations in the 15 and  $4.3 \mu\text{m}$  CO<sub>2</sub> emission bands (e.g. Alexander and Barnett, 2007; Hoffmann and Alexander, 2009; Hoffmann et al., 2013).

AIRS measurements enable the study of stratospheric gravity waves at unprecedented horizontal resolution. In order to fully  
20 exploit these observations, accurate and easily-reproducible analysis methods for the measurement of gravity wave properties must be developed.

The Stockwell transform (S-transform) (Stockwell et al., 1996; Stockwell, 1999) is a widely-used spectral analysis technique for providing time-frequency (or distance-wavenumber) localisation of a time series (or spatial profile). This capability makes the S-transform well suited to gravity wave analysis of a variety of geophysical data (e.g. Fritts et al., 1998; Alexander et al.,  
25 2008; McDonald, 2012; Wright and Gille, 2013). The S-transform has also been used in a variety of other fields, such as the planetary (Wright, 2012), engineering (Kuyuk, 2015) and medical sciences (Goodyear et al., 2004; Yan et al., 2015).

Alexander and Barnett (2007) developed a method for measuring gravity wave amplitudes, horizontal wavelengths and directions of propagation from AIRS granules using the one-dimensional S-transform. In their method, the S-transform is computed for each cross-track row, and co-spectra between adjacent cross-track rows are used to obtain spectral information in the along-  
30 track dimension. To find the dominant waves in each granule, these cross-track co-spectra are averaged together and up to five peaks are located in each averaged spectrum. The method of Alexander and Barnett provides good first-order measurement of the properties of the (up to five) dominant wave features in a granule, but it can introduce unwanted biases as discussed further in Sect. 5.

Here, we present a new analysis method. AIRS radiance measurements are two-dimensional (2-D) images; thus a gravity wave analysis method using a two-dimensional Stockwell transform (2DST) is a more logical approach. ~~Here,~~ In this study we present a 2DST-based method for the measurement of gravity wave amplitudes, horizontal wavelengths, and directions of propagation from AIRS measurements. Our method takes advantage of the spatial-spectral localisation capabilities of the S-transform in both dimensions simultaneously, equally and without bias.

South Georgia and the Antarctic Peninsula, together with the southern tip of South America, lie in a well-known hot spot of stratospheric gravity wave activity during austral winter, which has been extensively studied both observationally (~~Eckermann and Preusse, 1999; Alexander and Teitelbaum, 2007; Baumgaertner and McDonald, 2007; Hertzog et al., 2008; Alexander et al., 2012; Sato et al., 2012; Plougonven et al., 2013~~) with numerical modelling techniques (Hertzog et al., 2008; Plougonven et al., 2010; Shutts and Vosper, 2011; Hertzog et al., 2012; Sato et al., 2012; Plougonven et al., 2013) in the last decade. These mountainous regions are subjected to a strong wintertime circumpolar flow in the troposphere and stratosphere, and as a result are major orographic gravity wave sources (e.g. Hoffmann et al., 2013). Despite this, discrepancies between observed and modelled gravity wave fluxes in this region are the largest anywhere on the planet (Geller et al., 2013). This unique geography of this important region provides a “natural laboratory” in which to make clear gravity wave measurements from space, and is thus an ideal region in which to test our 2DST methodology on AIRS measurements.

In Sect. ~~??-we introduce~~ 2 we introduce AIRS data and the 1-D and 2-D ~~S-transform~~ S-transforms. In Sect. 3 we apply the 2DST to a specified wave field, describing our methodology for spatial localisation of the dominant spectral components. In Sect. 4 we present ~~two alternative windowing functions~~ a new alternative spectral window for use in the 2DST. In Sect. 5 we apply the 2DST to two selected AIRS granules measured over the Antarctic Peninsula/Drake Passage and South Georgia and discuss our results. Finally, in Sect. 6 we summarise the key results of this study and discuss the advantages of our 2DST method in the context of previous work.

## 2 Data and spectral methods

### 2.1 AIRS data

Gravity waves can be detected in AIRS radiance measurements as perturbations from a background state. Here, we use AIRS Level 1B radiance measurements from the  $667.77 \text{ cm}^{-1}$  channel. These Level 1 radiances have considerably higher horizontal resolution than operational Level 2 temperature retrievals due to retrieval choices imposed on the latter (Hoffmann and Alexander, 2009). We compute brightness temperature  $T$  directly from radiance  $R$  as

$$\bar{T} = \frac{hc\nu}{k_B} \left( \ln \left( \frac{2hc^2\nu^3}{R} + 1 \right) \right)^{-1}, \quad (1)$$

where  $h$  is Planck’s constant,  $c$  is the speed of light,  $k_B$  is Boltzmann’s constant and  $\nu = 667.77 \text{ cm}^{-1}$  is the wavenumber of the specified channel. Temperature perturbations  $T'$  from the local background state  $\bar{T}$  are then extracted via a fourth-order polynomial fit (Wu, 2004; Alexander and Barnett, 2007). This fit removes limb-brightening and other large-scale fluctuations.

These brightness temperature perturbations are a more useful physical quantity with which to define gravity wave amplitudes, since gravity wave energies and momentum fluxes are easier defined in terms of temperature ~~perturbations (e.g. Ern et al., 2004).~~ perturbations (e.g. Ern et al., 2004). Common limitations in temperature perturbation-based momentum flux calculations, such as the assumption of a monochromatic wave and observational filtering effects, do remain however and are discussed in more  
 5 detail in Sect. 5.3.

The weighting function of the  $667.77 \text{ cm}^{-1}$  channel peaks near 3 hPa ( $\sim 40 \text{ km}$ ), with a full width at half maximum of  $\sim 12 \text{ km}$  ~~(Alexander and Barnett, 2007, illustrated in Figure 1 of Wright et al. (2015a))~~ (Alexander and Barnett, 2007, also illustrated in Figure 1 of V  
 Gravity waves with vertical wavelengths shorter than 12 km are thus unlikely to be resolved and vertical wavelengths close to this limit will be strongly attenuated.

10 If the vertical wavelength is known, it is possible to correct for this attenuation by dividing the amplitude by an appropriate rescaling factor (Alexander and Barnett, 2007, their Fig. 4). Although methods for measuring long vertical wavelengths using multiple AIRS channels have been developed (e.g. Hoffmann and Alexander, 2009), we do not have direct measurements of vertical wavelength from our single AIRS channel, and so we do not apply such a correction to brightness temperature perturbations at this stage. The true amplitude of some waves in our initial analysis may therefore be between two and five  
 15 times greater than the values shown. ~~For~~ Later however, for the estimation of momentum flux in Sect. 5.3, we do apply the attenuation correction described in Alexander and Barnett (2007).

### 3 The Stockwell transform

#### 2.1 The Stockwell transform

In its analytical form, the one-dimensional Stockwell transform (Stockwell et al., 1996) closely resembles a continuous wavelet  
 20 transform (CWT) with a complex sinusoidal mother wavelet windowed with a scalable Gaussian window (Gibson et al., 2006). For time series data, this scalable Gaussian localises wave perturbations in the time domain through spectral localisation in the frequency domain.

For a smoothly-varying, continuous and one-dimensional function of time  $h(t)$ , the generalised analytical form of the S-transform  $S(\tau, f)$  (e.g. Pinnegar and Mansinha, 2003) is given as

$$25 \quad S(\tau, f) = \int_{-\infty}^{\infty} h(t) \omega_g(\underline{t-\tau-t}, f) e^{-i2\pi ft} dt, \quad (2)$$



where  $\tau$  is translation in the time domain,  $f$  is frequency and  $\omega(t-\tau, f)$  is a windowing function, scaled with frequency, that provides spatial and spectral localisation. Traditionally,  $\omega(t-\tau, f)$  takes the form of the normalised Gaussian window

$$\omega_{gau}(t-\tau, f) = \frac{|f|}{c\sqrt{2\pi}} \frac{1}{\sigma\sqrt{2\pi}} e^{-\frac{(t-\tau)^2 f^2}{2c^2} - \frac{(t-\tau)^2}{2\sigma^2}} \quad (3)$$

- 5 where  $c$  is a scaling parameter for the width where  $\sigma$  is the standard deviation. A key aspect of the Gaussian window, whose standard deviation  $\sigma$  is scaled in Eqn. 3 is that the standard deviation is scaled for each frequency as  $\sigma = \frac{c}{|f|}$ . Thus one has the familiar form of the S-transform

$$S(\tau, f) = \frac{|f|}{c\sqrt{2\pi}} \int_{-\infty}^{\infty} h(t) e^{-\frac{(t-\tau)^2 f^2}{2c^2}} e^{-i2\pi ft} dt,$$

- The factor, where  $c$  is a scaling parameter for the width of the Gaussian window (Mansinha et al., 1997a; Stockwell, 1999). Typically, usually set to 1 (Mansinha et al., 1997a). This window is often referred to as the “voice Gaussian”, which provides localisation of a specific frequency “voice” (Stockwell, 1999). Another key aspect of the Gaussian in Eqn. 3 is the normalisation factor  $1/\sigma\sqrt{2\pi}$ , which ensures that the integral of the window over all  $t$  is equal to unity, a requirement for any windowing function used in the S-transform. Substituting Eqn. 3 into Eqn. 2 allows us to write the S-transform more explicitly as

$$S(\tau, f) = \frac{|f|}{c\sqrt{2\pi}} \int_{-\infty}^{\infty} h(t) e^{-\frac{(t-\tau)^2 f^2}{2c^2}} e^{-i2\pi ft} dt. \quad (4)$$

- 15 Typically, the scaling parameter  $c$  is set to 1 (e.g. Stockwell et al., 1996; Alexander et al., 2008; Wright and Gille, 2013), but may it may also be set to other values to achieve more specific time-frequency localisation requirements (e.g. Mansinha et al., 1997b; Fritts et al., 1998; Pinnegar and Mansinha, 2003). Setting  $c > 1$  provides enhanced frequency localisation at the expense of time localisation, and contrarily setting  $c < 1$  achieves enhanced time localisation at the expense of frequency localisation. We discuss this effect. This effect is discussed in more detail in Sect. 4.

- 20 To compute the S-transform using the form in Eqn. 4, it seems we must compute the convolution of the Gaussian window a convolution involving the voice Gaussian and the time series for each frequency voice  $f$ . However, considerable computational advantage can be achieved by rewriting the S-transform as an operation in the frequency domain

, which can become quite computationally intensive. (Stockwell, 1999, their Sect. 3.5.1) showed that under the convolution theorem (Brigham, 1974), the time-domain convolution in Eqn. 4 could be written as a frequency-domain multiplication as

$$25 \quad S(\tau, f) = \int_{-\infty}^{\infty} H(\alpha+f) e^{-\frac{2\pi^2 c^2 (\alpha-f)^2}{f^2}} e^{-\frac{2\pi^2 c^2 \alpha^2}{f^2}} e^{i2\pi \alpha \tau} d\alpha \quad (5)$$

where  $\alpha$  is translation in the frequency domain and where  $H(\alpha + f)$  is a shifted version of  $H(\alpha)$  is, which is in turn the frequency analogue of  $H(t)$ . The Gaussian window  $w(\alpha - f, f)$  now takes the form

$$\omega_{gau}(\alpha - f, f) = e^{\frac{-2\pi^2 c^2 (\alpha - f)^2}{f^2}}$$

where the standard deviation now frequency-domain form of the voice Gaussian, denoted by  $\omega_g(\alpha, f)$ , is given as

$$\omega_g(\alpha, f) = e^{\frac{-2\pi^2 c^2 \alpha^2}{f^2}} \quad (6)$$

The standard deviation  $\sigma_\alpha$  of this frequency-domain Gaussian window in Eqn. 6 scales with frequency as  $\sigma = \frac{|f|}{2\pi c} \cdot \sigma_\alpha = |f|/c$ . Note that this voice Gaussian is unnormalised; its peak value is equal to 1 in the frequency domain.

HereIn this frequency-domain form, the S-transform is computed for each frequency voice  $f$  as the inverse Fourier transform of the product of  $H(\alpha)H(\alpha + f)$  and the corresponding frequency-domain Gaussian window  $w(\alpha - f, f)$  in Eqvoice Gaussian  $\omega_g(\alpha, f)$  in Eqn. 6. By computing Crucially, writing the S-transform via this as the frequency-domain multiplication, we avoid the computational expense of a convolution operation. Computationally in Eqn. 5 enables computationally efficient (“fast”) discrete Fourier transform (DFT) algorithms are also and simple multiplication operations to be used. The S-transform is most commonly implemented in this manner within the atmospheric sciences.

The S-transform has a number of desirable characteristics for geophysical data analysis. Unlike a CWT, the absolute magnitudes of the complex-valued S-transform coefficients in  $S(\tau, f)$  may be directly interpreted as the instantaneous are directly related to the true underlying amplitude of the corresponding frequency voice  $f$  at each location  $\tau$ . Information regarding wave amplitude is not strictly recoverable from a CWT, since the corresponding CWT coefficients are psuedo-correlation coefficients between the signal and the analysing wavelet.

One disadvantage to using fast DFT algorithms in an S-Transform implementation is the familiar coarse wavelength resolution at low frequencies, a limitation not encountered by the CWT. Since both the S-transform and DFT algorithms are easily extended to higher dimensions however, the reduced computational expense of a DFT-based S-transform makes this is a practical tool for large 2-D datasets. Retention of the wave amplitude information in the S-transform is another key advantage.

## 2.2 The two-dimensional Stockwell transform

The S-transform is easily extended to higher dimensions. For a two-dimensional 2-D image  $h(x, y)$ , the two-dimensional S-transform (2DST) is given by (Mansinha et al., 1997a; Stockwell, 1999)

$$S(\tau_x, \tau_y, k_x, k_y) = \frac{|k_x||k_y|}{2\pi c^2} \times \dots \frac{|f_x||f_y|}{2\pi c^2} \int_{-\infty}^{\infty} \int_{-\infty}^{\infty} h(x, y) e^{-\frac{(x-\tau_x)^2 k_x^2 + (y-\tau_y)^2 k_y^2}{2c^2} - \left(\frac{(x-\tau_x)^2 f_x^2 + (y-\tau_y)^2 f_y^2}{2c^2}\right)} e^{-i2\pi(k_x x + k_y y)} dx dy e^{-i2\pi(f_x x + f_y y)} \quad (7)$$

where  $\tau_x, \tau_y$  are translation in the  $x$  and  $y$  directions respectively. Here,  $f_x$  and  $k_y$  are translation and wavenumber  $f_y$  are simple spatial frequencies (inverse of wavelength) in the  $x$  and  $y$  directions respectively (Mansinha et al., 1997a; Stockwell, 1999).

Note that the transformed space has units of wavenumber  $k_x, k_y$  rather than frequency, since we define an input image with units of distance, following the notation of Stockwell (1999). For the remainder of the present paper however, we switch to using angular wavenumbers  $k_x = 2\pi f_x$  and  $k_y = 2\pi f_y$ , since this notation is more commonly used in the atmospheric sciences. Rewriting Eqn. 7 in terms of angular wavenumbers  $k_x$  and  $k_y$  gives

$$S(\tau_x, \tau_y, k_x, k_y) = \frac{|k_x||k_y|}{8\pi^3 c^2} \int_{-\infty}^{\infty} \int_{-\infty}^{\infty} h(x, y) e^{-\left(\frac{(x-\tau_x)^2 k_x^2 + (y-\tau_y)^2 k_y^2}{8\pi^2 c^2}\right)} e^{-i(k_x x + k_y y)} dx dy \quad (8)$$

The Gaussian windowing term in Eqn. 8 describes the 2-D voice Gaussian  $w_g(x - \tau_x, y - \tau_y, k_x, k_y)$ , where

$$w_g(x, y, k_x, k_y) = \frac{|k_x||k_y|}{8\pi^3 c^2} e^{-\frac{k_x^2 x^2 + k_y^2 y^2}{8\pi^2 c^2}} \quad (9)$$

This is the 2-D form of the 1-D Gaussian window in Eqn. 3. Here, the characteristic size of the Gaussian window is scaled as  $\sigma_x = \frac{c}{|k_x|}$  standard deviations of the 2-D Gaussian window in Eqn. 9 are scaled with wavenumber in the  $x$  and  $\sigma_y = \frac{c}{|k_y|}$  in the  $y$  directions as  $2\pi c/|k_x|$  and  $2\pi c/|k_y|$ , where  $c$  is a scaling parameter. The 2DST is introduced and well-described by Mansinha et al. (1997a) and Mansinha et al. (1997b), who demonstrated its promise for pattern analysis.

As with the one-dimensional S-transform discussed in Sect. 2.1, greater computational efficiency can be achieved by implementing is achieved by computing the 2DST as an operation in the wavenumber domain as

$$S(\tau_x, \tau_y, k_x, k_y) = \frac{1}{4\pi^2} \int_{-\infty}^{\infty} \int_{-\infty}^{\infty} H(\alpha_x + k_x, \alpha_y + k_y) \times \dots e^{-\frac{2\pi^2 c^2}{k_x^2} \left( \frac{(\alpha_x - k_x)^2}{k_x^2} + \frac{(\alpha_y - k_y)^2}{k_y^2} \right) - \left( \frac{2\pi^2 c^2 \alpha_x^2}{k_x^2} + \frac{2\pi^2 c^2 \alpha_y^2}{k_y^2} \right)} e^{i2\pi(\alpha_x \tau_x + \alpha_y \tau_y)} d\alpha_x d\alpha_y \quad (10)$$

where  $\alpha_x, \alpha_y$  are translations in the wavenumber domain and  $H(\alpha_x + k_x, \alpha_y + k_y)$  is a shifted version of  $H(\alpha_x, \alpha_y)$  is, which is in turn the wavenumber analogue of the input image  $h(x, y)$ .

Here wavenumbers  $k_x$  and  $k_y$  are used to scale, in  $\alpha_x$  and  $\alpha_y$  directions respectively, the standard deviations of the wavenumber-domain form of the 2-D voice Gaussian  $W_g(\alpha_x, \alpha_y, k_x, k_y)$ , which is given as

$$W_g(\alpha_x, \alpha_y, k_x, k_y) = e^{-\left(\frac{2\pi^2 c^2 \alpha_x^2}{k_x^2} + \frac{2\pi^2 c^2 \alpha_y^2}{k_y^2}\right)} \quad (11)$$

The 2DST has is introduced and well-described by Mansinha et al. (1997a) and Mansinha et al. (1997b), who demonstrated its promise for pattern analysis. It has since been discussed and implemented applied in a variety of fields (Liu and Wong, 2007; Kocahan et al., to our knowledge it has yet to be implemented used for geophysical data analysis in the atmospheric sciences, despite the wide use of the 1-D form. In the following section, we describe our 2DST implementation methodology for the purpose of gravity wave analysis from 2-D data.

### 3 Implementation of the 2DST on analysis of a specified wave field

To assess the capabilities of the 2DST, it is logical to first apply it to a two-dimensional specified wave field containing synthetic waves with known characteristics.

We create a specified wave field  $h(x, y)$  with dimensions  $100 \times 100$  km containing synthetic waves with unit **amplitude** **amplitudes** and known wavelengths. Wave amplitudes are defined as temperature perturbations  $T'$  in units of Kelvin. The synthetic waves are localised around their central locations with Gaussian functions (although note that they do overlap). We also add random (“salt and pepper”) noise up to 10% of the wave amplitude.

We first compute the 2-D DFT  $H(\alpha_x, \alpha_y)$  of our specified wave field  $h(x, y)$ . To recover an estimate of **instantaneous-the underlying** wave amplitude, we use the familiar symmetry around the zeroth frequency in the Fourier domain to recover a 2-D analogy of the analytic signal, **following the approach of Stockwell (1999)**. A 2-D DFT contains four quadrants that contain coefficients which are in complex-conjugate pairs with the coefficients in the opposite quadrant. The sum of these pairs always yields a real signal. By setting the coefficients of two of these quadrants to zero, and doubling their opposite quadrants, we obtain a complex-valued image when we take the inverse DFT. The magnitude of this image is **analogous-to-the-instantaneous analogous to the underlying wave** amplitude, while the complex part **describes-describes** instantaneous phase. All coefficients not in a complex conjugate pair are unchanged.

~~Next, we localise the wavenumber spectrum for each wavenumber voice  $k_x$  and  $k_y$  by multiplying  $H(\alpha_x, \alpha_y)$  by the two-dimensional Gaussian window~~

$$\omega_{gau}(\alpha_x, \alpha_y, k_x, k_y) = e^{-2\pi^2 c^2 \left( \frac{(\alpha_x - k_x)^2}{k_x^2} + \frac{(\alpha_y - k_y)^2}{k_y^2} \right)},$$

~~whose widths in the  $\alpha_x$  and  $\alpha_y$  directions are scaled by wavenumbers  $k_x$  and  $k_y$  respectively and the scaling parameter  $c$ .~~

~~We compute the 2DST. The full 2DST spectrum  $S(\tau_x, \tau_y, k_x, k_y)$  can then be computed by taking the inverse 2-D DFT of the product of the shifted spectrum  $H(\alpha_x - k_x, \alpha_y - k_y)$  and the corresponding voice Gaussian  $W_g(\alpha_x, \alpha_y, k_x, k_y)$  for each wavenumber voice  $k_x$  and  $k_y$  by sliding the Gaussian window through the wavenumber domain, taking the inverse 2-D DFT of each windowed spectrum.~~

For our purposes, we do not need to evaluate  $S(\tau_x, \tau_y, k_x, k_y)$  for all positive and negative wavenumbers, since evaluating all positive and negative values of  $k_y$  and only the positive values of  $k_x$  gives us all the degrees of freedom. There is a residual  $180^\circ$  ambiguity in wave propagation direction which cannot be broken without additional information, which is supplied in Sect. 5.3.

A useful aspect of our implementation is that, like the CWT, we can compute the 2DST for any individual or range of permitted wavenumber voices by applying the appropriate wavenumber-scaled Gaussian windows. Although the permitted wavenumber voices in the spectral domain are evenly spaced, their corresponding wavelengths are limited to integer fractions (i.e.  $1/n$  where  $n = 0, 1, 2, \dots, N-1$ ) of the number of elements  $N$  in each dimension. This is an unavoidable consequence of using computationally-efficient DFT algorithms, which results in the familiar coarse spectral resolution seen at long wavelengths.

The ability to analyse an image at specific wavenumbers is a desirable aspect in geophysical data analysis, where some ~~a priori~~ a priori information regarding the spectral range of wavenumbers detectable in a given dataset can be used to reduce the impact of unphysical, spurious or noisy results in 2DST analysis.

### 3.1 Measuring gravity wave properties

5 The 2DST  $S(\tau_x, \tau_y, k_x, k_y)$  of our specified wave field is a four-dimensional object. For each location in  $h(x, y)$ , a two-dimensional complex-valued image of the localised spectral coefficients  $\kappa(k_x, k_y)$  is evaluated.

Figure 1 shows a specified wave field  $h(x, y)$  for which the 2DST has been computed. The absolute magnitude of the localised two-dimensional wavenumber spectrum  $|\kappa(k_x, k_y)|$  is plotted for three different example locations. The coefficients of  $|\kappa(k_x, k_y)|$  can be directly interpreted as the ~~instantaneous~~ underlying amplitudes of waves with wavenumbers  $k_x$  and  $k_y$  at a given location in the specified wave field. As discussed in previous studies (e.g. Wright and Gille, 2013; Wright et al., 2015b), there are likely to be multiple peaks in  $|\kappa(k_x, k_y)|$  corresponding to overlapping waves at the same location in  $h(x, y)$ . Indeed, in Fig. 1(b) we examine a location in the specified wave field where a small, high-wavenumber wave is located at the intersection of four lower-wavenumber waves. The localised spectrum computed by the 2DST shown in the foreground represents this feature well. The maximum spectral response is located in a peak at high  $k_x$  and  $k_y$  wavenumbers, with four smaller spectral peaks at lower wavenumbers with lower spectral responses.

A four-dimensional complex-valued function can be difficult to visualise. A more useful product might be a series of two-dimensional images, the same size as the input image, that contain the characteristics of the dominant wave at each location. In the implementation presented here, we neglect overlapping waves and identify a single dominant wave for each location in  $h(x, y)$ .

20 For each such location, we record the complex coefficient of  $\kappa(k_x, k_y)$  located at the spectral peak of  $|\kappa(k_x, k_y)|$ . This yields one complex-valued image  $\xi(\tau_x, \tau_y)$ , with the same dimensions as the specified wave field  $h(x, y)$ , which contains the amplitude and phase of the dominant wave at each location.

The location of the spectral peak in  $|\kappa(k_x, k_y)|$  also gives us the wavenumbers  $k_x$  and  $k_y$  to which this peak coefficient corresponds. Hence, we can produce two further images  $K_x(\tau_x, \tau_y)$  and  $K_y(\tau_x, \tau_y)$  which contain the dominant wavenumbers at each location in the specified wave field to which the coefficients of  $\xi(\tau_x, \tau_y)$  correspond.

Thus, in the three images  $\xi(\tau_x, \tau_y)$ ,  $K_x(\tau_x, \tau_y)$  and  $K_y(\tau_x, \tau_y)$ , we can measure the amplitudes, phases, wavelengths and propagation directions of the dominant wave features at each location in our specified wave field.

Figure 2(a) shows our specified wave field  $h(x, y)$ . The central locations of the eight synthetic waves with unit amplitudes and known wavelengths are numbered 1 to 8.

30 By taking the real part of the complex-valued image  $\xi(\tau_x, \tau_y)$  containing the dominant coefficients, we can recover a “reconstruction” of the specified wave field, ~~and this~~ which is shown in Fig. 2(b). This is made possible by ~~our analytic signal~~ the approach described above in Sect. 3.1.

The 2DST identifies the different spectral regimes of the specified wave field very well, but the reconstructed wave amplitudes are reduced by comparison to their original values.

We suspect the main reason for the reduced amplitudes relates to the “spreading” of spectral power in the transform. ~~In practise, real-world waves~~ Here, as is often the case for gravity waves in the real world, our simulated waves form small wave packets, where wave amplitude decreases around a central location. Such wave packets are usually represented in the spectral domain as some combination of wavenumber voices, ~~such that~~ in addition to the dominant wavenumber of each of the packets, in order to accurately describe their spatial properties ~~can be accurately recovered~~. This means that the spectral power of a single ~~wave~~, non-infinite wave packet can be spread across multiple wavenumber voices. Spectral leakage ~~contributes~~ can further contribute to this effect ~~further~~.

The Gaussian window in the 2DST is equal to one at its central location, but immediately falls away with increasing radius. This means that ~~the spectral power that is~~ any spectral power contained in adjacent wavenumber voices, which is required to fully reconstruct the wave, is reduced. When the inverse DFT is computed, the recovered wave amplitude at this location is thus often diminished.

~~Another~~ A further reason for the diminished amplitude recovery in Fig. 2(b) is due to wave undersampling. This undersampling effect is worse for longer wavelengths, since fewer wave cycles are present in the same-sized region of the image. The wave undersampling limitations of the S-transform are well-understood in one dimension (Wright, 2010; Wright et al., 2015b).

Figure 2(c) shows the absolute magnitude of  ~~$\xi(\tau_x, \tau_y)$~~  the complex-valued image  $|\xi(\tau_x, \tau_y)|$ , which corresponds to the ~~instantaneous~~ full underlying amplitude of the dominant wave at each location. This output is useful for defining regions of the specified wave field that do or do not ~~constrain the observed waves~~ contain clear and obvious wave features (McDonald, 2012).

The horizontal wavelength  ~~$\lambda_H(\tau_x, \tau_y) = (K_x^2 + K_y^2)^{-2}$~~   $\lambda_H(\tau_x, \tau_y) = (K_x(\tau_x, \tau_y)^2 + K_y(\tau_x, \tau_y)^2)^{-1/2}$  of the dominant wave at each location is shown in Fig. 2(d). Again, the different regimes of each wave in the specified wave field are clearly distinguished.

The direction of wave propagation  $\theta(\tau_x, \tau_y)$ , measured anticlockwise from the x-axis, is found as  $\tan^{-1} \frac{K_x}{K_y}$ , and plotted as Fig. 2(e). Note that  $\theta(\tau_x, \tau_y)$  is subject to a  $\pm\pi$  radian ambiguity, which is reconciled with *a priori* information in our AIRS analysis in Sect. 5.3.

To assess the effectiveness of our spectral analysis of the specified wave field, we compare the known wavelengths and propagation angles of the synthetic waves in the test image with the 2DST-measured wavelengths and propagation angles in Fig. 2(f). For each wave numbered 1 to 8, blue dots show the input wavelength  $\lambda_{IN}$  against measured wavelength  $\lambda_{OUT}$ , indicating that the 2DST measures the horizontal wavelengths and propagation angles in the test image very well. Generally, shorter wavelengths are well-resolved but longer wavelengths are slightly underestimated. This ~~is likely~~ may be due to the coarse spectral resolution of DFT-based methods for waves with wavelengths that are a large fraction of the image size, since such waves ~~are~~ can be more susceptible to spectral leakage problems.

#### 4 ~~Alternative~~ An alternative spectral windowing methods window

The use of the Gaussian window in the S-transform has some convenient mathematical advantages; it is analytically simple and has a definite integral over an infinite range. However, when it is used for 2-D S-transform analysis an unfortunate side effect ~~in two-dimensions of the Gaussian window~~ is the poor recovery of wave amplitude, discussed in the previous section.

- 5 Although a Gaussian is traditionally used, any suitable apodizing function may be used, as so long as its spatial integral is equal to unity ~~(e.g. Stockwell, 2007)~~ (Stockwell, 2007). For example, Pinnegar and Mansinha (2003) used an asymmetric hyperbolic time-domain window for enhanced measurement of the onset times of one-dimensional time series components.

- In this section, we ~~investigate the use of two alternative two-dimensional windowing functions in~~ introduce a new spectral windowing function for the 2DST. ~~We first consider an elliptical spectral window  $\omega_{ell}$ , which corresponds to a sine-function-shaped window in the spatial domain. We then consider a sine-function spectral window  $\omega_{sinc}$ , which corresponds to a pseudo-elliptical-shaped window. This new function takes the shape of an ellipse in the wavenumber domain, and a first-order Bessel function of the first kind  $J_1(z)$  function with a scaled  $1/z$  envelope in the spatial domain. These two functions represent logical extremes for apodizing functions in the 2DST.~~

- (for definition of  $z$  see Eqn. 14 below). For this reason we refer to this window as the Elliptic-Bessel (E-B) window. We find that ~~the use of an elliptical windowing function in the spectral domain can greatly improve amplitude recovery while maintaining good spatial and spectral~~ when AIRS measurements are analysed with the 2DST using this new Elliptic-Bessel window in place of the traditional Gaussian, the measurement of gravity wave amplitudes is greatly improved. Spectral resolution is also improved slightly, without adversely compromising spatial resolution.

##### 4.1 ~~Elliptical~~ The Elliptic-Bessel window

- 20 As discussed ~~above~~ in Sect. 3.1, the spectral peaks in a DFT spectrum have a characteristic width, where the spectral power is spread in a broad peak around the central wavenumber. This spectral power is slightly reduced when a Gaussian window is applied, due to the immediate decrease in the Gaussian function around the central location. ~~This effect is illustrated for a one-dimensional Gaussian window (solid red line) in Fig. 3(a).~~ The effect can be mitigated, but not fully reconciled, by decreasing the scaling parameter  $c$ , which broadens the ~~spectral Gaussian window~~ Gaussian window in the wavenumber domain.
- 25 However, this decreases the width of the spatial window, which increases the effect of wave undersampling for low wavenumbers.

One solution to this problem is to ~~define an elliptical windowing function  $\omega_{ell}(\alpha_x, \alpha_y, k_x, k_y)$  in the spectral domains~~

$$\omega_{ell}(\alpha_x, \alpha_y, k_x, k_y) = \begin{cases} 0 & \text{for } 2\pi c \sqrt{\frac{(\alpha_x - k_x)^2}{k_x^2} + \frac{(\alpha_y - k_y)^2}{k_y^2}} \geq 1 \\ 1 & \text{for } 2\pi c \sqrt{\frac{(\alpha_x - k_x)^2}{k_x^2} + \frac{(\alpha_y - k_y)^2}{k_y^2}} < 1 \end{cases}.$$

The exact width of this elliptical window is scaled in the use a window that is an ellipse in the wavenumber domain. Here we introduce an Elliptic-Bessel window  $W_{eb}$ , defined in the wavenumber domain as the ellipse

$$W_{eb}(\alpha_x, \alpha_y, k_x, k_y) = \begin{cases} 0 & \text{for } \left(\frac{\alpha_x}{a}\right)^2 + \left(\frac{\alpha_y}{b}\right)^2 \geq 1 \\ 1 & \text{for } \left(\frac{\alpha_x}{a}\right)^2 + \left(\frac{\alpha_y}{b}\right)^2 < 1 \end{cases} \quad (12)$$

where  $a = |k_x|/2\pi c$  and  $b = |k_y|/2\pi c$  are the widths in the  $\alpha_x$  and  $\alpha_y$  directions as twice the standard deviation. We see that the semi-major and semi-minor axes of this “voice ellipse” scale with angular wavenumbers and are equal to the standard deviations of the equivalent voice Gaussian window in Eq. ?? . This is illustrated in Fig. 3(c). This elliptical window captures the full Eqn. 11.

A key feature of this new window is that, in the wavenumber domain, it does not immediately decrease with displacement from the central location, but rather has a scalable elliptical region within which the function is equal to unity. Thus, the window captures a much greater extent of the targeted spectral peak at  $k_x$  and  $k_y$ , greatly improving which can greatly improve wave amplitude recovery compared to the traditional Gaussian window. The width of  $\omega_{ell} W_{eb}$  can also be more carefully adjusted using the scaling parameter  $c$ . This elliptical window can then be used in place of the Gaussian windowing term in Eq. ?? Eqn. 10.

The use of an elliptical window in the One requirement for any apodizing window used in the Stockwell transform is that the spatial integral of the function must be equal to unity. This is so that the spatial integral of the Stockwell transform is equal to the Fourier transform  $H(k_x, k_y)$  (Mansinha et al., 1997a), namely

$$\int_{-\infty}^{\infty} \int_{-\infty}^{\infty} S(\tau_x, \tau_y, k_x, k_y) d\tau_x d\tau_y = H(k_x, k_y) \quad (13)$$

which has the useful result of making the 2DST significantly improves wave amplitude recovery when compared to fully invertible (Stockwell, 1999, 2007).

The normalisation term  $|k_x||k_y|/8\pi^3 c^2$  in the traditionally-used Gaussian window in Eqn. 9 ensures that the Gaussian window satisfies this requirement. To check that the Elliptic-Bessel function is admissible as an apodizing function, we must first find its spatial form, then check that its spatial integral is also equal to unity.

The Elliptic-Bessel window  $W_{eb}(\alpha_x, \alpha_y, k_x, k_y)$  is easily defined in the wavenumber domain as an ellipse, but its spatial form, which we denote as  $w_{eb}(x, y, k_x, k_y)$  is given as

$$w_{eb}(x, y, k_x, k_y) = \frac{|k_x||k_y|}{8\pi^3 c^2} \frac{\mathbf{J}_1(z)}{z} \quad (14)$$

where  $\mathbf{J}_1$  is the first-order Bessel function of the first kind (Abramowitz and Stegun, 1964) and

$$z = \frac{1}{2\pi c} \sqrt{k_x^2 x^2 + k_y^2 y^2}.$$



A short derivation of the function in Eqn. 14 is provided in Appendix A1. Fortunately, the spatial integral of Eqn. 14 is indeed equal to unity, proof of which is presented in Appendix A2. This confirms that the Elliptic-Bessel window is admissible as an apodizing function in the 2-D Stockwell transform, and validates its use in this study and beyond.

To recap our notation in this study, we have described two windowing functions for the equivalent Gaussian (see Fig. 4).

- 5 This is very useful in our analysis of AIRS data in Sect. 5. 2-D Stockwell transform: the traditional Gaussian and the new Elliptic-Bessel windows, which we denote in the spatial domain as  $w_g(x, y, k_x, k_y)$  and  $w_{eb}(x, y, k_x, k_y)$  respectively, and in the wavenumber domain as  $W_g(\alpha_x, \alpha_y, k_x, k_y)$  and  $W_{eb}(\alpha_x, \alpha_y, k_x, k_y)$  respectively, where the  $W_g$  and  $W_{eb}$  are the Fourier transforms of  $w_g$  and  $w_{eb}$ .

#### 4.2 Sine-window

- 10 Figure 3 shows three-dimensional surface plots of the spatial and wavenumber domain forms of the traditional 2-D Gaussian and new Elliptic-Bessel windows used in the 2-D Stockwell transform here.

- Another windowing approach is to use a scalable sine function  $\omega_{sinc}(\alpha_x, \alpha_y, k_x, k_y)$  for spectral domain localisation, illustrated in The surfaces in Figures 3(a) and 3(c) show the wavenumber-domain and spatial-domain forms of the Gaussian window, for arbitrary wavenumbers  $k_x$  and  $k_y$ . As discussed above, the maximum value of the Gaussian is equal to unity in the wavenumber domain, but equal to  $|k_x||k_y|/8\pi^3c^2$  in the spatial domain such that its spatial integral is equal to unity. This is a requirement of any windowing function in the S-transform. The standard deviations of the  $w_g$  and  $W_g$  scale with wavenumbers  $k_x$  and  $k_y$  as described in Sect. 2.2 (Eqns. 9 and 11), providing the voice Gaussian.

- Likewise, Figures 3(b) and 3(d) show the wavenumber-domain ( $W_{eb}$ ) and spatial-domain ( $w_{eb}$ ) forms of the Elliptic-Bessel window, for the same arbitrary wavenumbers  $k_x$  and  $k_y$  as used for the Gaussian windows in panels (a) and (c). The semi-major and semi-minor axes of the elliptic region in 3(b) are scaled with wavenumbers  $k_x$  and  $k_y$ , and are equal to the standard deviations of the equivalent Gaussian in 3(a), providing the voice ellipse.

- The spatial-domain form of the Elliptic-Bessel window  $w_{eb}$ , described by a Bessel-shaped function within an envelope, is shown in Fig. 3d. If we define our sine window 3(d) and described by Eqn. 14. The maximum value of  $w_{eb}$  is  $|k_x||k_y|/16\pi^3c^2$ , which ensures that its spatial integral is equal to unity. This is equal to half of the maximum value of the equivalent Gaussian in Fig. 3(c), since the terms involving  $z$  in Eqn. 14 tend to  $1/2$  as

$$\omega_{sinc}(\alpha_x, \alpha_y, k_x, k_y) = \frac{\sin\left(2\pi c \sqrt{R_{\alpha_x}^2/k_x^2 + R_{\alpha_y}^2/k_y^2}\right)}{2\pi c \sqrt{R_{\alpha_x}^2/k_x^2 + R_{\alpha_y}^2/k_y^2}}$$

- where  $R_{\alpha_x} = (\alpha_x - k_x)$  and  $R_{\alpha_y} = (\alpha_y - k_y)$ , we see that in the spatial domain this closely resembles an elliptical window of instantaneous radius  $R_{x,y}^2 = (c/k_x)^2 + (c/k_y)^2$ . Thus, for all real positive values of  $c$ , this sine window has the same width in the spatial domain as twice the standard deviation of the original Gaussian  $x \rightarrow 0$  and  $y \rightarrow 0$ . The width of the central region of  $w_{eb}$  is very slightly wider than the equivalent Gaussian, resulting in slightly coarser spatial resolution. However, the ability to “tune” the 2DST with the scaling parameter  $c$  ensures that this effect can be compensated by a reasonable trade-off.

In the next section we show that the use of the Elliptic-Bessel window defined in Eq. ???. Though some artefacts may persist due to edge truncation function at high wavenumbers, such a sine function can provide a strict elliptical localising window in the spatial domain with an abrupt edge, giving improved distinction between different wave regimes in the input image using the 2DST. As with both the elliptical and Gaussian windowing functions, the characteristic width of the sine window can be adjusted using the 2DST, in place of the traditional Gaussian window, significantly improves wave amplitude recovery. This is very useful for our analysis of AIRS data in Sect. 5.

## 4.2 Invertibility

A very convenient aspect of the S-transform is its invertibility. Since we have shown here that both the traditional Gaussian and new Elliptic-Bessel windows have spatial integrals equal to unity, the 2DST can be completely inverted to recover the original 2-D image, whichever of these windows or real non-zero positive values of the scaling parameter  $c$  are used. Note that a traditional 1-D or 2-D CWT does not necessarily have this capability. The fact that we can achieve such flexibility in spatial-spectral resolutions by swapping windows or by adjusting  $c$ , yet still retain the capability of inversion, further highlights the strength of the 2DST as a tool for spatial-spectral analysis of geophysical data.

Unfortunately, to take full advantage of DFT algorithms and the inversion capability of the 2DST for AIRS data, we must compute the 2DST using all permitted wavenumber voices in both dimensions. This requires nearly 12 000 inverse DFT calculations for each AIRS granule using the traditional voice-by-voice implementation described here, the computational load of which could be quite impractical for large-scale studies. Interpolating AIRS measurements to a coarser resolution with fewer pixels could be one solution to reduce computational cost, but this will obviously undersample short horizontal wavelengths in the data. Faster methods for computing the S-transform have been developed (Brown et al., 2010) which may increase practicality in the future. Other steps, such as avoiding programming loops and ensuring that any 2-D objects to be transformed have dimensions that are powers of two, may also reduce relative computational expense.

## 4.3 The effect of window choices on AIRS granules

Figure 4 shows an AIRS granule over the Southern Andes measured on 24<sup>th</sup> May 2008, analysed using the 2DST with three different windowing approaches.

In Figs. 4(b) and 4(e), we use a Gaussian windowing function with the scaling parameter  $c$  equal-set to one. This is the window usually used in 1DST implementations. We see that, as discussed above, this choice of window is only able to recover the very general, long-horizontal wavelength features of the granule, with poor spatial localisation and significantly reduced amplitude. This is due to a large proportion of the spectral response being lost by the windowing Gaussian when applied to two dimensions.

We can reduce the impact of this by decreasing the scaling parameter  $c$ , which broadens (narrows) the spectral (spatial) window. This provides improved amplitude recovery and improved spatial localisation at the expense of spectral localisation (Fritts et al., 1998). Since we only select a single dominant spectral peak for each location on the granule, this is acceptable for our

purposes. The “reconstructed” perturbations and horizontal wavelengths (Figs. 4(c) and (f)) are now much more representative of the wave features in the granule.

One problem remains, however. By decreasing  $c$ , we narrow our spatial window. In regions where wave amplitudes are low, such as the bottom-left corner of Fig. 4(a), this narrow Gaussian window starts to undersample long wavelengths, such that only very short wavelengths are attributed to the region. The ~~elliptical~~ Elliptic-Bessel window used in Figs. 4(d) and (g) performs better at recovering the underlying larger-scale structure of the granule, without defaulting to the small-scale noisy variations ~~due to undersampling~~. Amplitude recovery at all wavelengths is also improved over either of the Gaussian approaches.

In the general case, these low-amplitude, small-scale variations are unlikely to be due to gravity waves with vertical wavelengths visible to AIRS, so their recovery is something we try to avoid. Furthermore, such wavelengths are very close to or at the Nyquist limit for these data. Our confidence in their measurement is thus very low, yet the momentum fluxes they transport can dominate. We discuss this further in Sect. 5.4.

For the windowing functions considered, it is clear from Fig. 4 that the scaling parameter  $c$  has a ~~first-order~~ significant effect in determining the spatial-spectral localisation capabilities of the 2DST. The ~~elliptical~~ Elliptic-Bessel windowing function, with a scaling parameter of  $c = 0.25$ , was selected for our AIRS analysis in the next section. This choice provided the best trade-off between spatial and spectral localisation of different wave regimes in AIRS measurements. ~~The use of a sine window, (omitted for brevity) provides spatial-spectral localisation results roughly halfway between the Gaussian and elliptical windows-~~

As discussed in Sect. 3.1, the 2-D images  $\xi(\tau_x, \tau_y)$ ,  $K_x(\tau_x, \tau_y)$  and  $K_y(\tau_x, \tau_y)$  contain the dominant measured wave amplitudes and wavelengths at each location on the granule. These images are computed on a pixel-by-pixel basis, selecting a single monochromatic wave with the largest amplitude in the localised spectrum for each pixel.

As a result, the reconstructed images shown in Fig. 4 ~~when the same scaling parameter value is used.~~ (b-d), computed by taking the real part of the complex image  $\xi(\tau_x, \tau_y)$ , will never be perfect representations of the input data, but provide a “best guess” of the dominant features of the granule.

#### 4.4 Invertibility

Since we have shown that the 2DST is fully invertible for both the Gaussian and Elliptic-Bessel windowing approaches (Sections 4 and Appendix A), a complete reconstruction of the input image is of course producible by taking the “inverse” of the full four-dimensional 2DST object, but here we desire 2-D “maps” of wave properties, so a best guess method is used.

~~A very convenient aspect of the S-transform is its invertibility, namely that the temporal (or spatial) sum of the S-transform  $S(\tau, f)$  is equal to the Fourier transform  $H(f)$ :~~

$$\int_{-\infty}^{\infty} S(\tau, f) d\tau = H(f),$$

which can be easily inverted to recover the original signal. This feature of the S-transform is dependent on the requirement that the temporal (or spatial) sum of the selected windowing function  $\omega$  is equal to unity, namely

$$\int_{-\infty}^{\infty} \omega(\tau - t, f) d\tau = 1, \quad \text{or} \quad \int_{-\infty}^{\infty} \omega(\tau_x - x, k_x) dx = 1.$$

By taking the spatial sum of the Gaussian window in Eq. 4, we see that the normalisation term  $\frac{|k_x||k_y|}{2\pi c^2}$  ensures that this condition is satisfied. The spatial domain form of our spectral domain elliptical windowing function  $\omega_{ell}(\alpha_x, \alpha_y, k_x, k_y)$  in Eq. ?? is sine-shaped and given by

$$\omega_{ell}(\tau_x, \tau_y, k_x, k_y) = K_{ell} \times \text{sinc} \left( \frac{1}{2\pi c} \sqrt{(x - \tau_x)^2 k_x^2 + (y - \tau_y)^2 k_y^2} \right)$$

where  $K_{ell}$  is a normalisation factor and the sinc function is the unnormalised form (no factor of  $\pi$ ). Unfortunately, the spatial integral of A possible quantitative metric to assess the first-order effectiveness of our 2DST analysis in Fig. 4 could be to compare the variance of the sine term in ?? does not have a definite value, which means we cannot obtain an exact expression for  $K_{ell}$  input image with the variances of each of the reconstructions. However, a good approximation can be made if we take  $K_{ell} = \frac{|k_x||k_y|}{4\pi c^2}$ . This is equal to one half of the normalisation term used for the Gaussian window. Using this approximation, we are able to invert the 2DST when our elliptical windowing function is used, although this approximation can lead to under-representation of very low wavenumbers.

This means that, if required, the 2DST can be exactly inverted for the Gaussian and pseudo-inverted for the elliptical windowing functions presented here. Thus, since the reconstructions are computed as a best guess method on a pixel-by-pixel basis, their total variance is not readily related to the total variance of the input image and thus may not be meaningful as a comparison. Furthermore, such use of the original 2-D image can be recovered from the inverse DFT of the spatial sum of the 2DST. Note that a traditional CWT does not have this capability. The fact that we can achieve such flexibility in spatial-spectral resolutions by swapping our Gaussian window for an elliptical or by adjusting  $c$ , yet still retain the capability of inversion, further highlights the strength of the 2DST as a tool for spatial-spectral analysis of geophysical data. image variance would only be appropriate if the distribution of perturbations was unimodal and ideally Gaussian, which is not the case for an image of a sinusoidal wave. In practice however, we generally expect the variance of the reconstruction not to exceed the variance of the input image, since wave amplitudes computed on a pixel-by-pixel basis from a localised spectrum will usually be underestimated for the reasons given in Sect. 3.1.

Unfortunately, to take full advantage of DFT algorithms and the inversion capability of It is not impossible that in some rare cases the total variance of the 2DST for AIRS data, we must compute the 2DST using all permitted wavenumber voices in both dimensions. This requires nearly 12 000 inverse DFT calculations for each AIRS granule using the traditional voice-by-voice implementation described here. Interpolating AIRS measurements to a coarser resolution with fewer pixels could be one solution, but this will obviously undersample short horizontal wavelengths in the data. Faster methods for computing the S-transform have been developed (Brown et al., 2010) which may increase practicality in reconstruction could exceed the total

variance of the input image, for example due to the ~~future. Other steps, such as avoiding loops and ensuring that spatial~~ extent of a wave feature being slightly over-estimated. If the localised spectrum for one pixel is affected a larger amplitude wave feature in one of its neighbouring pixels, this can result in subtle artificial “borders” between different wave regimes in the reconstructions. This is not a limitation of the 2DST itself, but arises in the somewhat forced extraction of localised gravity-wave parameters contained in the 4-D Stockwell transform object  $S(\tau_x, \tau_y, k_x, k_y)$  in order to produce the 2-D ~~objects to be transformed have dimensions that are powers of two, may also reduce computational expense~~ image. This effect should be carefully considered in future work to ensure wave properties are not over-represented.

## 5 AIRS gravity wave analysis using the 2DST

In this section, we use our 2DST-based method to perform gravity wave analysis on two-dimensional granules of AIRS radiance measurements, comparing our analysis to that of previous studies. We use the 2DST to measure gravity wave amplitudes, horizontal wavelengths, and directions of propagation. We then use ECMWF-derived wind speeds and the assumption of an orographic wave source to infer vertical wavelengths and make estimates of gravity wave momentum flux (the vertical flux of horizontal pseudomomentum) by closely following the method of Alexander et al. (2009).

### 5.1 AIRS granule selection and pre-processing

The first AIRS granule selected for our study is granule 32 of 6<sup>th</sup> September 2003, over South Georgia. The second granule is a 135-pixel swath over the intersection between granules 39 and 40 on 2<sup>nd</sup> August 2010, located over the Antarctic Peninsula and Drake Passage.

Alexander et al. (2009) and Hoffmann et al. (2014) performed an analysis of these AIRS granules over South Georgia and the Antarctic Peninsula respectively. Their studies measured wave amplitudes, horizontal wavelengths and wave propagation directions using a one-dimensional S-transform method, as described by Alexander and Barnett (2007). In their method, the one-dimensional S-transform is computed for each cross-track row. Then, covariance spectra are computed between pairs of adjacent cross-track rows to measure phase shifts in the along-track direction, from which along-track wavelengths can be inferred. To find the dominant wave features in a granule, these co-spectra are averaged together and up to five spectral peaks are found in this averaged spectrum. This approach can provide computationally fast, first-order gravity wave analysis of AIRS granules, and it has been used in numerous other studies (e.g. Alexander and Teitelbaum, 2011; Alexander and Grimsdell, 2013; Wright et al., 2015a).

One limitation of this method is that the phase difference measurements required to recover along-track wavenumbers can introduce a strong cross-track bias in resolved features, since the S-transform is only computed in the cross-track direction. In addition, waves which occupy only small regions of the granule in the along-track direction may also be under-represented in the averaged co-spectrum. Furthermore, selecting no more than five dominant waves in the averaged co-spectrum implicitly limits the maximum number of available along-track wavenumber voices to no more than five for each location on the entire granule. The use of a two-dimensional Stockwell transform is a logical solution to each of these problems. With the increased

convenience of computational power since the study of Alexander and Barnet (2007), the 2DST now represents a more practical alternative to the one-dimensional method.

Before implementing the 2DST, each granule of brightness temperature perturbations is interpolated onto a regularly-spaced grid with approximately 17.7 km and 20.3 km separating adjacent pixels in the along-track and cross-track directions respectively. In the centre of the AIRS swath, the resolution of this regularly-spaced grid closely matches the spatial resolution of AIRS, so very little if any information is lost. Towards the edge of the swath, this grid is finer than the spatial resolution than AIRS, but the grid points will not exactly match the location of the AIRS footprints. A useful graphic of typical AIRS footprints can be found in (Hoffmann et al., 2014, their Fig. 2).

As a result of using ~~computationally-efficient two-dimensional~~ DFT algorithms, the maximum numbers of permitted wavenumber voices available in the along-track and cross-track directions are limited to  $N_{AT} - 1$  and  $N_{XT} - 1$ , where  $N_{AT}$  and  $N_{XT}$  are the number of pixels in the along-track and cross-track directions (135 and 90 respectively). These wavenumber voices have corresponding wavelengths that are integer fractions of the total along-track and cross-track dimensions of the granule. Here, we compute the 2DST for wavelengths greater than around 40 km. This is just over twice the Nyquist-sampling distance between AIRS pixels after interpolation onto our regular grid. The zeroth ~~frequency (the spatial mean of the granule) is~~ frequencies are omitted. Increased along-track spectral resolution at low wavenumbers can be obtained by applying the 2DST to two or more adjacent granules, thus increasing the number of along-track pixels.

## 5.2 AIRS gravity wave properties measured by the 2DST

The results of our 2DST analysis of the selected AIRS granules over South Georgia and the Antarctic Peninsula are shown in Figs. 5 and 6 respectively.

In both Figures, panel (a) shows the brightness temperature perturbation measurements calculated as described in Sect. ~~2.1~~ 2.1. Note that the colour scale is chosen so as to make wave perturbations clearer by eye, but at some locations it is saturated.

Clear wave-like perturbations are observed in both granules directly over and to the east of the mountain ranges. As in previous work, such clear wave-like perturbations are attributable to gravity waves with a high degree of certainty.

Reconstructed 2DST temperature perturbations  $T'_{2DST}$  are shown in panel (b). These are found by taking the real part of the complex 2DST object  $\xi(\tau_x, \tau_y)$  as described in Sect. 3.1.

The image  $T'_{2DST}$  shows the dominant wave features in the granule reconstructed using only the pre-defined range of permitted wavenumber voices in the 2DST. Since we only consider the coefficients of the dominant wavenumber at each location, this reconstruction cannot be perfect, but it provides a visual inspection of how well the 2DST outputs represent the dominant wave characteristics of the granule. The  $T'_{2DST}$  image can be used to “fine-tune” the 2DST by changing the windowing function, by adjusting the scaling parameter  $c$ , or by redefining the range of frequency voices until the desired outcome is achieved. Such fine-tuning flexibility cannot be so easily achieved using the 1DST method.

Generally, the agreement between reconstructed wave features in Figure 5(b) and AIRS measurements in Figures 5(a) is very good, but some uncertainties remain. As discussed in Sect. 4.3, there is some discrepancy regarding the spatial extent of some wave features, such as a small positive wave crest located just south west of South Georgia which appears to be located slightly

east, with an apparently slightly over-estimated amplitude, than is observed in the AIRS measurements. Conversely, at 63°S 28°W, a positive bow-shaped wave crest is observed in the AIRS measurements but is under-estimated in the reconstruction. As mentioned in Sect. 4.3, these small misrepresentations are not a limitation of the 2DST itself, but rather the forced extraction of gravity wave parameters from the 4-D S-transform object in order to create the 2-D reconstruction, where only one single wave feature with the largest localised spectral amplitude is assigned at each location. The overall agreement is still very good, but future work to improve the extraction of gravity wave parameters from the 4-D S-transform object may help to resolve some of these discrepancies.

Panels 5(c) and 6(c) show ~~instantaneous-wave-amplitude~~ full underlying wave amplitudes  $|T'|_{2DST}$  for each granule. This is found by taking the absolute magnitude of the complex 2DST object  $\xi(\tau_x, \tau_y)$  as described in Sect. 3.1. This property provides us with a useful metric with which to define regions of the granule which do or do not contain wave-like perturbations, such that we can limit spurious detections (e.g. McDonald, 2012). In Figs. 5(h) and 6(c-h), we exclude regions of each granule where the ~~instantaneous-underlying~~ wave amplitude is more than one standard deviation below the mean ~~of-the-wave amplitudes~~ underlying wave amplitude of the granule. In Figs. 5(c-g), we do not exclude such regions for discussion purposes, so as to provide an example of the data we would otherwise omit.

Panels 5(d) and 6(d) show absolute horizontal wavelengths  $\lambda_H = (k_{AT}^2 + k_{XT}^2)^{-1/2}$ , where  $k_{AT}$  and  $k_{XT}$  are the along-track and cross-track wavenumbers respectively. We can see that these horizontal wavelengths clearly define different regimes of the dominant wave features of the granules, as in the test case in Sect. 3.1, though the AIRS data are more complex. In the South Georgia granule in Fig. 5(d), we see that the island lies within a wave field where long horizontal wavelengths are dominant around and to the east of the island over the ocean, with their wavenumber vectors aligned roughly parallel to the direction of the mean flow. This is characteristic of a wing-shaped mountain wave field (Alexander and Grimsdell, 2013), and is in good agreement with visual inspection of the granule itself.

In panels 5(e) and 6(e), we show the orientation of the horizontal wavenumber vector measured anticlockwise from east.  $\theta$  is calculated by first projecting the along-track and cross-track wavenumber vectors  $k_x$  and  $k_y$  into their zonal and meridional components  $k$  and  $l$  using the azimuths of the along-track and cross-track directions at each location on the granule, then taking  $\theta = \tan^{-1}(\frac{l}{k})$ . Note that  $\theta$  only describes the orientation and not the true horizontal direction of propagation of the wavenumber vectors, which retain a  $\pm 180^\circ$  ambiguity that we break below.

In the South Georgia granule (Fig. 5), we see that our 2DST measurements in the southern ~~portion-region~~ of the granule are largely dominated by small-scale, low-amplitude, short horizontal wavelength features with random directions of propagation. Most of these features are likely to be due to noise and not attributable to coherent wave structures. By using a threshold amplitude, such regions are effectively removed, leaving well-defined regions with clear wavelike perturbations. The contribution of small-scale features ~~than-that~~ remain after this step is discussed further in Sect. 5.4.

### 5.3 Momentum fluxes

Here we make estimates of gravity wave momentum flux for the dominant wave-like features measured by the 2DST in our selected granules, following the method of Alexander et al. (2009).



The Ern et al. (2004) showed that the zonal and meridional components of gravity wave momentum flux  $MF_x$  and  $MF_y$  are given by

$$\left( MF_x, MF_y \right) = \frac{\rho}{2} \left( \frac{g}{N} \right)^2 \left( \frac{T'_a}{\bar{T}} \right)^2 \left( \frac{k}{m}, \frac{l}{m} \right) \quad (15)$$

where  $\rho$  is density at a height of 40 km,  $g$  is the acceleration due to gravity,  $N$  is the buoyancy frequency,  $T'_a$  is the attenuation-scaled instantaneous full underlying wave amplitude,  $\bar{T}$  is the background temperature, and  $k$ ,  $l$  and  $m$  are wavenumbers in the zonal, meridional and vertical directions respectively (Ern et al., 2004). Eqn. 15 assumes the mid-frequency approximation (Fritts and Alexander, 2003, their Sect. 2.1), which is valid for a large portion of the observable gravity wave spectrum. For these waves,  $m^2 \ll (k^2 + l^2)$  and Coriolis effects are negligible, as is the case for nearly all waves measured here due to the size of the AIRS beam footprint (Hoffmann et al., 2014) and the vertical weighting function of the  $667.77 \text{ cm}^{-1}$  channel (Alexander and Barnett, 2007). When compared with momentum fluxes calculated without making the mid-frequency approximation, Ern et al. (2004) found discrepancies typically not exceeding around 10%.

We also have a  $\pm 180^\circ$  ambiguity in direction of propagation, which we break by assuming the waves in our granules always propagate against the mean flow. The last unknown in Eq. 15 is vertical wavenumber  $m = 2\pi/\lambda_z$ . Under the assumption that the waves are upwardly propagating mountain waves with ground-based phase velocity equal to zero,  $\lambda_z$  is given as

$$\lambda_z \approx \frac{2\pi \bar{U}_{||}}{N} \quad (16)$$

where  $\bar{U}_{||}$  is the component of the mean wind speed parallel to the wave's horizontal wavenumber vector (Eckermann and Preusse, 1999).  $\bar{U}_{||}$  is found by projecting the mean wind vector  $\bar{U}$  in the direction of the wave propagation angle  $\theta$  shown in Figs. 5(e) and 6(e).

Figures 5(f) and 6(f) show  $\bar{U}_{||}$  coincident with each granule at an altitude of 40 km from ECMWF operational analyses, projected onto each granule's regular grid. Orange contours and black arrows show the magnitude and direction of  $\bar{U}_{||}$  respectively. Vertical wavelength  $\lambda_z$  is shown in Figs. 5(g) and 6(g).

Towards the south-eastern corner of both granules, mean wind speeds become quite weak. As they fall below around  $40 \text{ ms}^{-1}$ , vertical wavelengths start to drop below the vertical resolution limit of the AIRS channel. The wave field may continue into this region, but the vertical wavelengths may be too short to be resolved such that wave amplitudes are attenuated to below the ambient noise level. This is particularly clear in the Antarctic Peninsula granule, where detectable wave fronts abruptly terminate just as  $\bar{U}_{||}$  begins to fall below  $30 \text{ ms}^{-1}$ .

No further wave amplitude attenuation corrections were applied to regions where vertical wavelengths are inferred to be below 12 km, since this is beyond the resolution limit of the weighting function of the  $667.77 \text{ cm}^{-1}$  channel. It should be noted however that although theoretically valid, the attenuation correction applied here can in some cases increase wave amplitudes by perhaps an order of magnitude or more, despite being significantly susceptible to errors in wind speed, wave direction or both. This correction should be applied with caution, and the effects of its inclusion are discussed below and in Sect. 5.4.



In the South Georgia granule, peak momentum flux values of more than 500 mPa are associated with a small region of large amplitude and short horizontal wavelength wave features, located toward the south-eastern tip of the island. In the Antarctic Peninsula granule, momentum fluxes of a few hundred ~~millipascals~~ milliPascals are generally co-located with the clearly visible wave structures in the raw brightness temperature perturbations just downwind of the peninsula. ~~The magnitude, direction and distribution of momentum fluxes in both granules take reasonable values, and are broadly in line with previous AIRS gravity wave studies in the region (e.g. Alexander and Teitelbaum, 2007; Alexander et al., 2009; Alexander and Teitelbaum, 2011).~~

The key strength of the results presented here is the much-improved spatial-spectral localisation and resolution capabilities provided by full two-dimensional treatment of the AIRS data. Confidence in the accuracy of subsequent measured quantities in our 2DST-based analysis is thus greatly improved ~~analysis over previous 1DST-based over previous 1-D S-transform-based~~ methods. Understandably, the former is more computationally intensive than the latter, and this should be considered if datasets are large or computational resources are limited.

Although the magnitude, direction and distribution of momentum fluxes in both granules are broadly in line with previous AIRS gravity wave studies in the region (e.g. Alexander and Teitelbaum, 2007; Alexander et al., 2009; Alexander and Teitelbaum, 2011), momentum flux magnitudes are much higher than those observed in studies using limb-sounder datasets (e.g. Ern et al., 2004; Alexander et al., 2007) which generally do not exceed a few tens of mPa in this region. While we would not expect the magnitude of these fluxes to be the same as those observed by limb-sounders (1. nadir-sounding instruments are generally more sensitive to waves with longer vertical wavelengths and hence higher momentum fluxes due to the deep vertical weighting function (Alexander and Barnett, 2007); 2. momentum flux estimates from limb-sounders are typically lower-bound estimates due to the projection of horizontal wavelengths (Ern et al., 2004); and 3. wavelength-dependent wave amplitude attenuation corrections are not generally applied to limb-sounder results) we note that our results and those of other AIRS gravity wave studies in this region, which use a correction factor for wave amplitude attenuation based upon a vertical wavelength estimation, are substantially higher. This effect and its implications are discussed in the next section.

#### 5.4 Small-scale perturbations and the attenuation correction

In the implementation of any spectral image processing, it is important to strike a balance between accurate measurement of the desired properties and the spurious interpretation of noise. One of the advantages of AIRS measurements is the high horizontal resolution of the data. With the close exception of the Infrared Atmospheric Sounding Interferometer (IASI, e.g. Clerbaux et al., 2009), currently no other spaceborne instrument can measure stratospheric gravity waves with comparable horizontal resolution to AIRS. Therefore, accurate measurement of resolved waves with horizontal wavelengths close to the AIRS resolution limit are of great importance. Such short horizontal wavelength waves, if reliably resolved, will generally carry higher momentum fluxes via ~~Eq~~Eqn. 15. However, as we approach the resolution limits of AIRS measurements and our spectral methods, our confidence in the accuracy of our measurement of such waves decreases.

In Fig. 5, our 2DST analysis resolves a very small region of short horizontal wavelengths over the south-eastern tip of South Georgia. Wave perturbations in this small region are just a few pixels across, but their uncorrected brightness temperature

perturbations are large, with peaks of order 5 to 6 K. If these perturbations were located almost anywhere else on the granule we would likely attribute them to retrieval noise.

However, gravity waves with very short horizontal wavelengths, tightly packed in a region immediately downwind of a mountainous island, are in good agreement with mountain wave theory. Examples of such waves can be found in, for example, the modelling studies of Shutts and Vosper (2011) and Alexander and Teitelbaum (2011). If these waves are indeed real, their accurate measurement is of great importance.

An added complication is introduced as a result of the mountain wave assumption used. Since these waves are only a few pixels across, their directions of propagation are difficult to define, introducing a random element. The component of the mean wind parallel to the horizontal wavenumber vector can thus be very low, which decreases the vertical wavelength estimate, which in turn increases the attenuation correction applied to the observed temperature perturbations. This attenuation correction can increase temperature perturbations by 400% or more which, since momentum flux is proportional to the square of wave amplitude, can increase our estimate of momentum flux to extremely large values.

~~As a result, these~~ Thus, by applying a correction factor for wave amplitude attenuation, very small-scale low-confidence perturbations can yield extremely high momentum fluxes which can dominate the momentum budget of the entire granule if ~~a-the~~ mountain wave assumption is used, correctly or otherwise. This is evident in the South Georgia granule studied by Alexander et al. (2009) and shown in our Fig. 5, where peak momentum fluxes are localised over only a few large-amplitude pixels just over the south-eastern tip of the island. In Fig. 5(h), the flux peaks at almost 1000 mPa for one pixel in this small region, though the colour scale is saturated. Whether these fluxes are real or not, they can nevertheless be extremely large and should be approached with caution.

Figures 7(a) and 7(b) show gravity-wave momentum fluxes over the South Georgia and Antarctic Peninsula granules as shown in Figures 5 and 6, only with fluxes calculated without scaling the temperature perturbations for attenuation as described in Sect. 5. The highest momentum flux values in Figures 7(a) and 7(b) are around 70 and 30 mPa respectively, located within small regions in the wave field where the colour scale is saturated. As is expected, these values are much lower than those calculated using the attenuation-corrected wave amplitudes.

If these extremely high fluxes correspond to real waves, then their measurement is of ~~critical~~ crucial importance. However, if such perturbations are simply instrument noise and their fluxes are spurious, then the biases and errors introduced by their inclusion in broader studies could be very large.

Without *a priori* knowledge of the wave environment, which is most readily gained by visual inspection of the AIRS measurements, it would be unwise to include the fluxes from these small-scale perturbations in any automated analysis. Indeed, Wright et al. (2015b) suggest that when AIRS granules are pre-smoothed with a boxcar of width 3 pixels, resolved momentum fluxes calculated using the method of Alexander et al. (2009) can be reduced by an order of magnitude. This suggests that these small-scale, high-momentum flux features are reasonably common and can impact larger-scale momentum flux estimates, either realistically or spuriously.

Further work investigating this problem is encouraged. Pre-smoothing granules so as to exclude these perturbations ~~(e.g. Wright et al., 2015b)~~ is one solution. Excluding even more wavenumber voices corresponding to short horizontal wavelengths from our 2DST analysis

is another solution. However, in cases such as the South Georgia granule presented in Fig. 5, where such perturbations may well be physical, this exclusion can reduce peak momentum fluxes by orders of magnitude, introducing a systematic low-bias and thus further uncertainty.

## 6 Summary and Conclusions

5 In this study, we have applied the two-dimensional Stockwell transform (2DST) to granules of AIRS measurements, extracting gravity wave amplitudes, wavelengths and directions of propagation. Our 2DST method builds upon the work of Alexander and Barnett (2007), who used the one-dimensional Stockwell transform for the same purpose. Their method can introduce a strong cross-track bias problem, which we solve by using a full two-dimensional ~~S-Transform~~Stockwell transform.

We first define our 2DST implementation and test it on a specified wave field containing synthetic waves with known  
10 amplitudes, wavelengths and directions of propagation. We find that the 2DST provides very good spatial representation of the dominant spectral components of the specified wave field, accurately measuring wavelengths and orientations of all the synthetic waves.

Due to the spread of spectral power in the spectral domain and wave undersampling in the spatial domain, we find that localised wave amplitudes as measured by the 2DST are reduced by more than a factor of two when the typical Gaussian  
15 windowing function is used in the Stockwell transform. We compensate for this by decreasing the scaling parameter  $c$  and by replacing the Gaussian window with ~~alternative windowing functions~~new a alternative Elliptic-Bessel window, which we test on a granule of AIRS measurements over the southern Andes. We find that ~~the use of an elliptical windowing function provides the best trade-off~~this new spectral window provides a better balance between spatial-spectral localisation and the accurate measurement of wave amplitudes. Wave amplitude recovery is thus improved to around 80% to 90% of input values. We also  
20 demonstrate that this new window is indeed valid for use in the 2DST by showing its spatial integral in equal to unity.

Next, we measure gravity wave amplitudes, horizontal wavelengths and directions of propagation in two granules of AIRS measurements over South Georgia and the Drake Passage/Antarctic Peninsula region. Our 2DST method significantly improves  
the two-dimensional representation of the dominant spectral features of the granules over previous 1DST methods. These spectral features are directly measured in both dimensions simultaneously for each location of the granule, without the introduction  
25 of potential biases caused by the use of averaged co-spectra. This is a clear advantage over previous methods.

Another key advantage of our 2DST method is the ability to visually inspect the quality of our spectral analysis. By taking the real parts of the dominant localised spectral coefficients at each location, a ~~“reconstruction”~~reconstruction of the granule can be created. This can be used to fine-tune the adjustable parameters, and provide a useful sanity check on the performance of the 2DST. Future work may involve comparing this output to the original data via a variance argument or similar, such that  
30 we can obtain a quantitative measure of the quality of the 2DST analysis for quality control purposes in larger scale studies.

To conclude, our new 2DST-based gravity wave analysis method for AIRS data makes significant improvements over current methods in several key areas, and we would advocate its use in future work.

## Appendix A: Admissibility of the Elliptic-Bessel window in the Stockwell Transform

In Sect. 4 we introduced the Elliptic-Bessel window as new apodizing function for the 2-D Stockwell transform (2DST). One requirement for any apodizing function for use in the Stockwell transform is that its spatial sum must be equal to unity. If this condition is satisfied, the spatial sum of the 2DST is equal to the 2-D Fourier transform, making the 2DST fully invertible.

- 5 In this appendix we demonstrate that the Elliptic-Bessel window is admissible as an apodizing function in the S-transform. To do this, we must first find the spatial analogue of the wavenumber-domain ellipse we defined in Eqn. 12. We must then take the spatial integral of this function to demonstrate that it is equal to unity.

### A1 The Elliptic-Bessel window in the spatial domain

The Elliptic-Bessel window is defined in the wavenumber  $(\alpha_x, \alpha_y)$  domain as

$$10 \quad W_{eb}(\alpha_x, \alpha_y, k_x, k_y) = \begin{cases} 0 & \text{for } \left(\frac{\alpha_x}{a}\right)^2 + \left(\frac{\alpha_y}{b}\right)^2 \geq 1 \\ 1 & \text{for } \left(\frac{\alpha_x}{a}\right)^2 + \left(\frac{\alpha_y}{b}\right)^2 < 1 \end{cases} \quad (\text{A1})$$

where  $a = |k_x|/2\pi c$  and  $b = |k_y|/2\pi c$  are the half-widths of the ellipse in the  $\alpha_x$  and  $\alpha_y$  directions (see Fig. 3(b)). The spatial-domain form of the Elliptic-Bessel window, denoted here by  $w_{eb}(x, y, k_x, k_y)$ , is found by taking the inverse 2-D Fourier transform of Eqn. A1 as

$$w_{eb}(x, y, k_x, k_y) = \mathcal{F}_x^{-1} \mathcal{F}_y^{-1} [W_{eb}(\alpha_x, \alpha_y, k_x, k_y)] = \frac{1}{4\pi^2} \int_{-\infty}^{\infty} \int_{-\infty}^{\infty} W_{eb}(\alpha_x, \alpha_y, k_x, k_y) e^{i(\alpha_x x + \alpha_y y)} d\alpha_x d\alpha_y \quad (\text{A2})$$

- 15 Since  $W_{eb}(\alpha_x, \alpha_y, k_x, k_y) = 1$  within the ellipse and zero everywhere else, and has double symmetry, we can change the limits of integration to be the boundaries of the ellipse, expressing the total integral as a sum of four equal quadrants

$$w_{eb}(x, y, k_x, k_y) = \frac{4}{4\pi^2} \int_0^{\sqrt{b^2 - \frac{\alpha_x^2 b^2}{a^2}}} \int_0^a e^{i(\alpha_x x + \alpha_y y)} d\alpha_x d\alpha_y \quad (\text{A3})$$

We then recognise that the exponential term in the transform above can be replaced with sine and cosine functions as

$$20 \quad \begin{aligned} e^{i(\alpha_x x + \alpha_y y)} &= (\cos(\alpha_x x) + i \sin(\alpha_x x)) (\cos(\alpha_y y) + i \sin(\alpha_y y)) \\ &= \cos(\alpha_x x) \cos(\alpha_y y) + i \sin(\alpha_x x) \cos(\alpha_y y) + i \sin(\alpha_y y) \cos(\alpha_x x) - \sin(\alpha_x x) \sin(\alpha_y y) \end{aligned} \quad (\text{A4})$$

We can omit the last three terms in A4 since, due to the symmetry of the sine function around  $(0, 0)$ , each term will eventually sum to zero. We can then rewrite Eqn. A3 as

$$w_{eb}(x, y, k_x, k_y) = \frac{4}{4\pi^2} \int_0^{\sqrt{b^2 - \frac{\alpha_x^2 b^2}{a^2}}} \int_0^a \cos(\alpha_x x) \cos(\alpha_y y) d\alpha_x d\alpha_y \quad (\text{A5})$$

This integral can be further simplified if we switch to polar coordinates using the substitutions  $\alpha_x = ar \cos(\phi)$  and  $\alpha_y = br \sin(\phi)$  after which the expression in A5 becomes

$$w_{eb}(x, y, k_x, k_y) = \frac{ab}{4\pi^2} \int_0^{2\pi} \int_0^1 \cos(ar \cos(\phi)) \cos(br \sin(\phi)) r dr d\phi \quad (\text{A6})$$

Next we substitute  $\mathcal{A} = arx$  and  $\mathcal{B} = bry$  and, using multiple angle formulae, rewrite A6 as

$$\begin{aligned} 5 \quad w_{eb}(x, y, k_x, k_y) &= \frac{ab}{4\pi^2} \int_0^1 r \int_0^{2\pi} \cos(\mathcal{A} \cos(\phi)) \cos(\mathcal{B} \sin(\phi)) d\phi dr \\ &= \frac{ab}{8\pi^2} \int_0^1 r \int_0^{2\pi} [\cos(\mathcal{A} \cos \phi + \mathcal{B} \sin \phi) + \cos(\mathcal{A} \cos \phi - \mathcal{B} \sin \phi)] d\phi dr \end{aligned} \quad (\text{A7})$$

$$= \frac{ab}{8\pi^2} \int_0^1 r \int_0^{2\pi} [\cos(\sqrt{\mathcal{A}^2 + \mathcal{B}^2} \cos(\phi - \Lambda) + \cos(\sqrt{\mathcal{A}^2 + \mathcal{B}^2} \cos(\phi + \Lambda))] d\phi dr \quad (\text{A8})$$

where  $\Lambda = \tan^{-1}(\mathcal{B}/\mathcal{A})$ . Here,  $\Lambda$  is simply an arbitrary phase due to the periodicity of the cosine function when integrated over 0 to  $2\pi$ , so the integrals of both terms in the square brackets in Eqn. A8 will be equal. Hence we can simply add these terms such that we have

$$w_{eb}(x, y, k_x, k_y) = \frac{ab}{8\pi^2} \int_0^1 r \int_0^{2\pi} 2 \cos(\sqrt{\mathcal{A}^2 + \mathcal{B}^2} \cos \phi) d\phi dr \quad (\text{A9})$$

Next we recall the integral definition of the zeroth-order Bessel function of the first kind  $\mathbf{J}_0(x)$  (Abramowitz and Stegun, 1964) given as

$$\mathbf{J}_0(x) = \frac{1}{2\pi} \int_0^{2\pi} \cos(x \cos \phi) d\phi \quad (\text{A10})$$

and substitute into Eqn. A9 and reintroduce our substitutions of  $\mathcal{A} = arx$  and  $\mathcal{B} = bry$  to give

$$w_{eb}(x, y, k_x, k_y) = \frac{ab}{2\pi} \int_0^1 \mathbf{J}_0\left(r\sqrt{a^2x^2 + b^2y^2}\right) r dr \quad (\text{A11})$$

We now use a new substitution that  $\xi = r\sqrt{a^2x^2 + b^2y^2}$  and rewrite Eqn. A11 as

$$w_{eb}(x, y, k_x, k_y) = \frac{ab}{2\pi} \int_0^{\sqrt{a^2x^2 + b^2y^2}} \frac{\xi \mathbf{J}_0(\xi)}{a^2x^2 + b^2y^2} d\xi \quad (\text{A12})$$

Next we use the standard result (e.g. Abramowitz and Stegun, 1964) that

$$\int_{x_1}^{x_2} x \mathbf{J}_0(x) dx = x \mathbf{J}_1(x) \Big|_{x_1}^{x_2} \quad (\text{A13})$$

to rewrite Eqn. A12 as

$$\begin{aligned} w_{eb}(x, y, k_x, k_y) &= \frac{ab}{2\pi} \frac{\xi \mathbf{J}_1(\xi)}{(a^2 x^2 + b^2 y^2)} \Big|_0^{\sqrt{a^2 x^2 + b^2 y^2}} \\ &= \frac{ab}{2\pi} \frac{\mathbf{J}_1\left(\sqrt{a^2 x^2 + b^2 y^2}\right)}{\sqrt{a^2 x^2 + b^2 y^2}} \end{aligned} \quad (\text{A14})$$

Finally, recalling that  $a = |k_x|/2\pi c$  and  $b = |k_y|/2\pi c$  are the half-widths of the original ellipse in A1, we now can write the analytical expression for the spatial form of the Elliptic-Bessel window as

$$w_{eb}(x, y, k_x, k_y) = \frac{|k_x||k_y|}{8\pi^3 c^2} \frac{\mathbf{J}_1(z)}{z} \quad (\text{A15})$$

where

$$z = \frac{1}{2\pi c} \sqrt{k_x^2 x^2 + k_y^2 y^2}$$

This spatial-domain form of the Elliptic-Bessel window in Eqn. A15 is plotted in Fig. 3(d).

Equation A15 describes a  $\mathbf{J}_1(z)$  function within a scaled  $1/z$  envelope. Because of this, the terms involving  $z$  in A15 converge to  $1/2$  as  $x \rightarrow 0$  and  $y \rightarrow 0$ , such that the central region of the function has peak value of  $|k_x||k_y|/16\pi^3 c^2$ , as shown in Fig. 3(d). Interestingly, this value is equal to half the peak value of the equivalent Gaussian window shown in Fig. 3(c). The central peak of the Elliptic-Bessel window is also, for each frequency voice, slightly broader than that of the equivalent voice Gaussian.

## A2 Spatial integral of the Elliptic-Bessel window

Now that we have found an analytical expression for the spatial-domain form of the Elliptic-Bessel window (Eqn. A15), we can proceed to check that it is admissible as an apodizing function in the 2-D Stockwell transform; namely that its spatial sum is equal to unity (e.g. Pinnegar and Mansinha, 2003). The spatial sum of Eqn. A15, denoted here by  $\mathbb{I}$ , can be written as

$$\mathbb{I} = \int_{-\infty}^{\infty} \int_{-\infty}^{\infty} \frac{|k_x||k_y|}{8\pi^3 c^2} \frac{\mathbf{J}_1(z)}{z} dx dy \quad (\text{A16})$$

This integral can be simplified if we reintroduce our substitutions  $a = |k_x|/2\pi c$  and  $b = |k_y|/2\pi c$  and switch to polar coordinates, using the substitutions  $x = \frac{\Lambda \cos(\varphi)}{a}$  and  $y = \frac{\Lambda \sin(\varphi)}{b}$  to give

$$\begin{aligned}
 \mathbb{I} &= \frac{ab}{2\pi} \int_0^{2\pi} \int_0^\infty \frac{\mathbf{J}_1(\Lambda)}{\Lambda} \frac{\Lambda}{ab} d\Lambda d\varphi \\
 &= \frac{1}{2\pi} \int_0^{2\pi} \int_0^\infty \mathbf{J}_1(\Lambda) d\Lambda d\varphi \\
 5 \quad &= \frac{2\pi}{2\pi} \int_0^\infty \mathbf{J}_1(\Lambda) d\Lambda
 \end{aligned} \tag{A17}$$

Using the standard result (e.g. Abramowitz and Stegun, 1964) that

$$\int_{x_1}^{x_2} \mathbf{J}_1(x) dx = -\mathbf{J}_0(x) \Big|_{x_1}^{x_2} \tag{A18}$$

we see that Eqn. A17 becomes

$$\begin{aligned}
 \mathbb{I} &= -\mathbf{J}_0(\Lambda) \Big|_0^\infty \\
 10 \quad &= (0) - (-1) \\
 &= 1
 \end{aligned} \tag{A19}$$

as required. This result confirms that the spatial sum of  $w_{eb}(x, y, k_x, k_y)$  is indeed equal to unity, thus the Elliptic-Bessel window is admissible as an apodizing window for the 2-D Stockwell transform.

### A3 Admissibility of other windows

- 15 In this appendix so far, we have found a useful analytical expression for spatial form of the Elliptic-Bessel window presented in this study. We have then shown that its spatial integral is equal to unity and it is thus admissible as an apodizing function in the 2-D Stockwell Transform. In other cases, a quick test may be performed on candidate S-transform windowing functions to check if this spatial integral is unity.

If we take the spatial integral  $\mathbb{I}$  of the spatial-domain form of a candidate windowing function  $w(x, y, k_x, k_y)$ , namely

$$20 \quad \mathbb{I} = \int_{-\infty}^{\infty} \int_{-\infty}^{\infty} w(x, y, k_x, k_y) dx dy \tag{A20}$$

and introduce the factor  $e^{-i(k_x x + k_y y)}$ , noting that when  $k_x = k_y = 0$  this factor is equal to unity, then  $\mathbb{I}$  can be written as

$$\mathbb{I} = \int_{-\infty}^{\infty} \int_{-\infty}^{\infty} w(x, y, k_x, k_y) e^{-i(k_x x + k_y y)} dx dy \Big|_{k_x = k_y = 0} \quad (\text{A21})$$

$$= W(\alpha_x, \alpha_y, k_x, k_y) \Big|_{k_x = k_y = 0} \quad (\text{A22})$$

- 5 where  $W(\alpha_x, \alpha_y, k_x, k_y)$  is the wavenumber domain form of the candidate window and the notation  $\Big|_{k_x = k_y = 0}$  denotes that the function is evaluated at  $k_x = k_y = 0$ . This means that if the value of  $W(\alpha_x, \alpha_y, k_x, k_y)$  evaluated at  $k_x = 0$  and  $k_y = 0$  is equal to unity, then its spatial integral will also be equal to unity. If it is not, then the candidate window is not admissible for use the Stockwell transform. Figures 3(a) and 3(b) show that both the Gaussian window and the Elliptic-Bessel window are equal to unity at  $k_x = k_y = 0$ , and thus satisfy this requirement. This short test may be helpful in the design of proposed alternative S-transform windowing functions in the future.



*Acknowledgements.* NPH is funded by a NERC studentship awarded to the University of Bath. CJW and NJM are supported by NERC grant NE/K015117/1. The authors would like to thank the AIRS programme team for many years of hard work producing the data used [here](#), and [also the anonymous reviewers for their helpful suggestions](#).

## References

- Abramowitz, M. and Stegun, I.: Handbook of Mathematical Functions: With Formulas, Graphs, and Mathematical Tables, Applied mathematics series, Dover Publications, 1964.
- Alexander, M. J. and Barnett, C.: Using satellite observations to constrain parameterizations of gravity wave effects for global models., J. Atmos. Sci., 64, 1652–1665, doi:10.1175/JAS3897.1, 2007.
- Alexander, M. J. and Grimsdell, A. W.: Seasonal cycle of orographic gravity wave occurrence above small islands in the Southern Hemisphere: Implications for effects on the general circulation, J. Geophys. Res., 118, 11 589–11 599, doi:10.1002/2013JD020526, 2013.
- Alexander, M. J. and Teitelbaum, H.: Observation and analysis of a large amplitude mountain wave event over the Antarctic peninsula, J. Geophys. Res., 112, n/a–n/a, doi:10.1029/2006JD008368, 2007.
- Alexander, M. J. and Teitelbaum, H.: Three-dimensional properties of Andes mountain waves observed by satellite: A case study, J. Geophys. Res., 116, n/a–n/a, doi:10.1029/2011JD016151, 2011.
- Alexander, M. J., Gille, J., Cavanaugh, C., Coffey, M., Craig, C., Eden, T., Francis, G., Halvorson, C., Hannigan, J., Khosravi, R., Kinnison, D., Lee, H., Massie, S., Nardi, B., Barnett, J., Hepplewhite, C., Lambert, a., and Dean, V.: Global estimates of gravity wave momentum flux from High Resolution Dynamics Limb Sounder observations, J. Geophys. Res., 113, D15S18, doi:10.1029/2007JD008807, 2008.
- Alexander, M. J., Eckermann, S. D., Broutman, D., and Ma, J.: Momentum flux estimates for South Georgia Island mountain waves in the stratosphere observed via satellite, Geophys. Res. Lett., 36, L12 816, doi:10.1029/2009GL038587, 2009.
- Alexander, M. J., Geller, M., McLandress, C., Polavarapu, S., Preusse, P., Sassi, F., Sato, K., Eckermann, S., Ern, M., Hertzog, A., Kawatani, Y., Pulido, M., Shaw, T. A., Sigmond, M., Vincent, R., and Watanabe, S.: Recent developments in gravity-wave effects in climate models and the global distribution of gravity-wave momentum flux from observations and models, Quart. J. Roy. Meteor. Soc., 136, 1103–1124, doi:10.1002/qj.637, 2010.
- Aumann, H., Chahine, M., Gautier, C., Goldberg, M., Kalnay, E., McMillin, L., Revercomb, H., Rosenkranz, P., Smith, W., Staelin, D., Strow, L., and Susskind, J.: AIRS/AMSU/HSB on the Aqua mission: design, science objectives, data products, and processing systems, IEEE Transactions on Geoscience and Remote Sensing, 41, 253–264, doi:10.1109/TGRS.2002.808356, 2003.
- Barry, R. L., Strother, S. C., and Gore, J. C.: Complex and magnitude-only preprocessing of 2D and 3D BOLD fMRI data at 7T, Magnetic Resonance in Medicine, 67, 867–871, doi:10.1002/mrm.23072, 2012.
- Baumgaertner, A. J. G. and McDonald, A. J.: A gravity wave climatology for Antarctica compiled from Challenging Minisatellite Payload/Global Positioning System (CHAMP/GPS) radio occultations, J. Geophys. Res., 112, D05 103, doi:10.1029/2006JD007504, 2007.
- Brigham, E. O.: The Fast Fourier Transform, Prentice-Hall Inc., 1974.
- Brown, R. A., Lauzon, M. L., and Frayne, R.: A General Description of Linear Time-Frequency Transforms and Formulation of a Fast, Invertible Transform That Samples the Continuous S-Transform Spectrum Nonredundantly, IEEE Trans. Sig. Proc., 58, 281–290, doi:10.1109/TSP.2009.2028972, 2010.
- Butchart, N., Charlton-Perez, A. J., Cionni, I., Hardiman, S. C., Haynes, P. H., Krüger, K., Kushner, P. J., Newman, P. A., Osprey, S. M., Perlwitz, J., Sigmond, M., Wang, L., Akiyoshi, H., Austin, J., Bekki, S., Baumgaertner, A., Braesicke, P., Brühl, C., Chipperfield, M., Dameris, M., Dhomse, S., Eyring, V., Garcia, R., Garny, H., Jöckel, P., Lamarque, J.-F., Marchand, M., Michou, M., Morgenstern, O., Nakamura, T., Pawson, S., Plummer, D., Pyle, J., Rozanov, E., Scinocca, J., Shepherd, T. G., Shibata, K., Smale, D., Teyssède, H., Tian, W., Waugh, D., and Yamashita, Y.: Multimodel climate and variability of the stratosphere, J. Geophys. Res., 116, n/a–n/a, doi:10.1029/2010JD014995, d05102, 2011.

- Clerbaux, C., Boynard, A., Clarisse, L., George, M., Hadji-Lazaro, J., Herbin, H., Hurtmans, D., Pommier, M., Razavi, A., Turquety, S., Wespes, C., and Coheur, P. F.: Monitoring of atmospheric composition using the thermal infrared IASI/MetOp sounder, *Atmos. Chem. Phys.*, 9, 6041–6054, 2009.
- Eckermann, S. D. and Preusse, P.: Global Measurements of Stratospheric Mountain Waves from Space, *Science*, 286, 1534–1537, doi:10.1126/science.286.5444.1534, 1999.
- Ern, M., Preusse, P., Alexander, M. J., and Warner, C. D.: Absolute values of gravity wave momentum flux derived from satellite data, *J. Geophys. Res.*, 109, D20 103, doi:10.1029/2004JD004752, 2004.
- Ern, M., Preusse, P., Gille, J. C., Hepplewhite, C. L., Mlynczak, M. G., Russell, J. M., and Riese, M.: Implications for atmospheric dynamics derived from global observations of gravity wave momentum flux in stratosphere and mesosphere, *J. Geophys. Res.*, 116, D19 107, doi:10.1029/2011JD015821, 2011.
- Fritts, D. C. and Alexander, M. J.: Gravity wave dynamics and effects in the middle atmosphere, *Reviews of Geophysics*, 41, 1003, doi:10.1029/2001RG000106, 2003.
- Fritts, D. C., Riggin, D. M., Balsley, B. B., and Stockwell, R. G.: Recent results with an MF radar at McMurdo, Antarctica: Characteristics and variability of motions near 12-hour period in the mesosphere, *Geophys. Res. Lett.*, 25, 297–300, doi:10.1029/97GL03702, 1998.
- Geller, M., Alexander, M. J., Love, P., Bacmeister, J., Ern, M., Hertzog, A., Manzini, E., Preusse, P., Sato, K., Scaife, A., and Zhou, T.: A Comparison between Gravity Wave Momentum Fluxes in Observations and Climate Models, *Journal of Climate*, 26, 6383–6405, doi:10.1175/JCLI-D-12-00545.1, 2013.
- Gibson, P. C., Lamoureux, M. P., and Margrave, G. F.: Letter to the editor: Stockwell and wavelet transforms, *Journal of Fourier Analysis and Applications*, 12, 713–721, doi:10.1007/s00041-006-6087-9, 2006.
- Goodyear, B. G., Zhu, H. M., Brown, R. A., and Mitchell, J. R.: Removal of phase artifacts from fMRI data using a Stockwell transform filter improves brain activity detection, *Magnetic Resonance in Medicine*, 51, 16–21, doi:10.1002/mrm.10681, 2004.
- Hertzog, A., Boccara, G., Vincent, R. A., Vial, F., and Cocquerez, P.: Estimation of gravity wave momentum flux and phase speeds from quasi-Lagrangian stratospheric balloon flights. Part II: Results from the Vorcore campaign in Antarctica., *J. Atmos. Sci.*, 65, 3056–3070, doi:10.1175/2008JAS2710.1, 2008.
- Hertzog, A., Alexander, M. J., and Plougonven, R.: On the Intermittency of Gravity Wave Momentum Flux in the Stratosphere, *J. Atmos. Sci.*, 69, 3433–3448, doi:10.1175/JAS-D-12-09.1, 2012.
- Hindley, N. P., Wright, C. J., Smith, N. D., and Mitchell, N. J.: The southern stratospheric gravity wave hot spot: individual waves and their momentum fluxes measured by COSMIC GPS-RO, *Atmos. Chem. Phys.*, 15, 7797–7818, doi:10.5194/acp-15-7797-2015, 2015.
- Hoffmann, L. and Alexander, M. J.: Retrieval of stratospheric temperatures from Atmospheric Infrared Sounder radiance measurements for gravity wave studies, *J. Geophys. Res.*, 114, D07 105, doi:10.1029/2008JD011241, 2009.
- Hoffmann, L., Xue, X., and Alexander, M. J.: A global view of stratospheric gravity wave hotspots located with Atmospheric Infrared Sounder observations, *J. Geophys. Res.*, 118, 416–434, doi:10.1029/2012JD018658, 2013.
- Hoffmann, L., Alexander, M. J., Clerbaux, C., Grimsdell, A. W., Meyer, C. I., Roessler, T., and Tournier, B.: Intercomparison of stratospheric gravity wave observations with AIRS and IASI, *Atmos. Meas. Tech.*, 7, 4517–4537, doi:10.5194/amt-7-4517-2014, 2014.
- Jiang, J. H., Wu, D. L., and Eckermann, S. D.: Upper Atmosphere Research Satellite (UARS) MLS observation of mountain waves over the Andes, *J. Geophys. Res.*, 107, doi:10.1029/2002JD002091, 2002.

- Kocahan, O., Coskun, E., and Oezder, S.: Profile Measurement of Objects by Using Stockwell and Continuous Wavelet Transforms, in: 2008 IEEE 16TH Signal Processing, Communication and Applications Conference, Vols. 1 and 2, pp. 804–807, IEEE, IEEE 16th Signal Processing and Communications Applications Conference, Aydin, Turkey, APR 20-22, 2008, 2008.
- Kuyuk, H. S.: On the use of Stockwell transform in structural dynamic analysis, *Sadhana-Academy Proceedings in Engineering Sciences*, 40, 295–306, doi:10.1007/s12046-014-0301-2, 2015.
- Liu, Y.: Localization Operators for Two-Dimensional Stockwell Transforms, in: *New Developments in Pseudo-Differential Operators*, edited by Rodino, L. and Wong, M. W., vol. 189 of *Operator Theory Advances and Applications*, pp. 287–296, Int Soc Anal Its Applicat & Computat, 6th Congress of the International-Society-for-Analysis-Its-Applications-and-Computation, Middle East Tech Univ, Ankara, Turkey, AUG 13-18, 2007, 2009.
- 10 Liu, Y. and Wong, M. W.: Inversion formulas for two-dimensional Stockwell transforms, in: *Pseudo-Differential Operators: Partial Differential Equations and time-frequency analysis*, edited by Rodino, L and Schulze, BW and Wong, MW, vol. 52 of *Fields Institute Communications*, pp. 323–330, Int Soc Anal, Applicat & Computat; Acad Initiat Fund; York Univ , Dept Math & Statist; York Univ, Off Vice-President Acad, Workshop on Pseudo-Differential Operators - Partial Differential Equations and Time-Frequency Analysis, Toronto, Canada, Dec 11-15, 2006, 2007.
- 15 Mansinha, L., Stockwell, R. G., and Lowe, R. P.: Pattern analysis with two-dimensional spectral localisation: Applications of two-dimensional S transforms, *Physica A.*, 239, 286–295, doi:10.1016/S0378-4371(96)00487-6, Proceedings of the International Conference on Pattern Formation in Fluids and Materials CPiP 96 (Collective Phenomena in Physics 96), University of Western Ontario, London, Canada, June 13-15, 1996, 1997a.
- Mansinha, L., Stockwell, R. G., Lowe, R. P., Eramian, M., and Schincariol, R. A.: Local S-spectrum analysis of 1-D and 2-D data, *Physics of the Earth and Planetary Interiors*, 103, 329–336, doi:10.1016/S0031-9201(97)00047-2, Conference on Geonomy in honor of Professor J A Jacobs, Edinburgh, Scotland, June 03-04, 1996, 1997b.
- 20 McDonald, A. J.: Gravity wave occurrence statistics derived from paired COSMIC/FORMOSAT3 observations, *J. Geophys. Res.*, 117, D15 106, doi:10.1029/2011JD016715, 2012.
- Pinnegar, C. R. and Mansinha, L.: The S-transform with windows of arbitrary and varying shape, *Geophysics*, 68, 381–385, doi:10.1190/1.1543223, 2003.
- 25 Plougonven, R., Arsac, A., Hertzog, A., Guez, L., and Vial, F.: Sensitivity study for mesoscale simulations of gravity waves above Antarctica during Vorcore, *Quart. J. Roy. Meteor. Soc.*, pp. 1371–1377, doi:10.1002/qj.639, 2010.
- Plougonven, R., Hertzog, A., and Guez, L.: Gravity waves over Antarctica and the Southern Ocean: consistent momentum fluxes in mesoscale simulations and stratospheric balloon observations, *Quart. J. Roy. Meteor. Soc.*, 139, 101–118, doi:10.1002/qj.1965, 2013.
- 30 Sato, K., Tateno, S., Watanabe, S., and Kawatani, Y.: Gravity Wave Characteristics in the Southern Hemisphere Revealed by a High-Resolution Middle-Atmosphere General Circulation Model., *J. Atmos. Sci.*, 69, 1378–1396, doi:10.1175/JAS-D-11-0101.1, 2012.
- Shutts, G. J. and Vosper, S. B.: Stratospheric gravity waves revealed in NWP model forecasts, *Quart. J. Roy. Meteor. Soc.*, 137, 303–317, doi:10.1002/qj.763, 2011.
- Stockwell, R., Mansinha, L., and Lowe, R. P.: Localization of the complex spectrum: the S-Transform, *IEEE Trans. Sig. Proc.*, 44, 998–1001, 1996.
- 35 Stockwell, R. G.: "S-Transform Analysis of Gravity Wave Activity from a Small Scale Network of Airglow Imagers", Ph.D. thesis, "University of Western Ontario", 1999.

- Stockwell, R. G.: A basis for efficient representation of the S-transform, *Digital Signal Processing*, 17, 371 – 393, doi:http://dx.doi.org/10.1016/j.dsp.2006.04.006, 2007.
- Wright, C. J.: Detection Of Stratospheric Gravity Waves Using HIRDLS Data, Ph.D. thesis, Trinity College, University of Oxford, 2010.
- Wright, C. J.: A one-year seasonal analysis of martian gravity waves using MCS data, *Icarus*, 219, 274–282, doi:10.1016/j.icarus.2012.03.004, 2012.
- 5 Wright, C. J. and Gille, J. C.: Detecting overlapping gravity waves using the S-Transform, *Geophy. Res. Lett.*, 40, 1850–1855, doi:10.1002/grl.50378, 2013.
- Wright, C. J., Hindley, N. P., Moss, A. C., and Mitchell, N. J.: Multi-instrument gravity-wave measurements over Tierra del Fuego and the Drake Passage - Part 1: Potential energies and vertical wavelengths from AIRS, COSMIC, HIRDLS, MLS-Aura, SAAMER, SABER and radiosondes, *Atmos. Chem. Phys. Disc.*, 8, 6797–6876, doi:10.5194/amtd-8-6797-2015, 2015a.
- 10 Wright, C. J., Osprey, S. M., and Gille, J. C.: Global distributions of overlapping gravity waves in HIRDLS data, *Atmos. Chem. Phys. Disc.*, pp. 4333–4382, doi:10.5194/acpd-15-4333-2015, 2015b.
- Wright, C. J., Hindley, N. P., and Mitchell, N. J.: Combining AIRS and MLS observations for three-dimensional gravity wave measurement, *Geophy. Res. Lett.*, 43, 884–893, doi:10.1002/2015GL067233, 2015GL067233, 2016.
- 15 Wu, D. L.: Mesoscale gravity wave variances from AMSU-A radiances, *Geophy. Res. Lett.*, 31, 1944–8007, doi:10.1029/2004GL019562, 112114, 2004.
- Yan, A., Zhou, W., Yuan, Q., Yuan, S., Wu, Q., Zhao, X., and Wang, J.: Automatic seizure detection using Stockwell transform and boosting algorithm for long-term EEG, *Epilepsy & Behavior*, 45, 8–14, doi:10.1016/j.yebeh.2015.02.012, 2015.

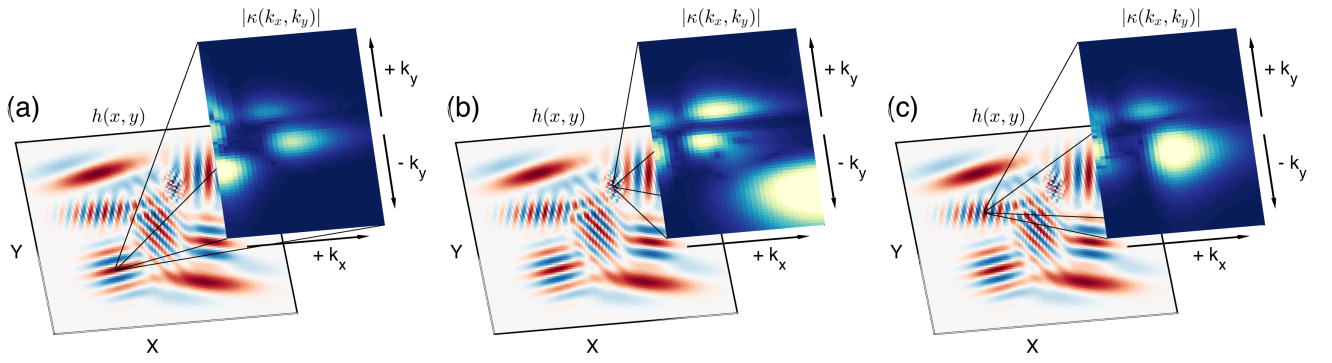

**Figure 1.** The specified wave field  $h(x, y)$  (background) for which the two-dimensional Stockwell transform (2DST) has been computed. The absolute magnitudes of the localised 2DST wavenumber spectra  $|\kappa(k_x, k_y)|$  (foreground) are plotted for three separate locations in panels (a), (b) and (c).

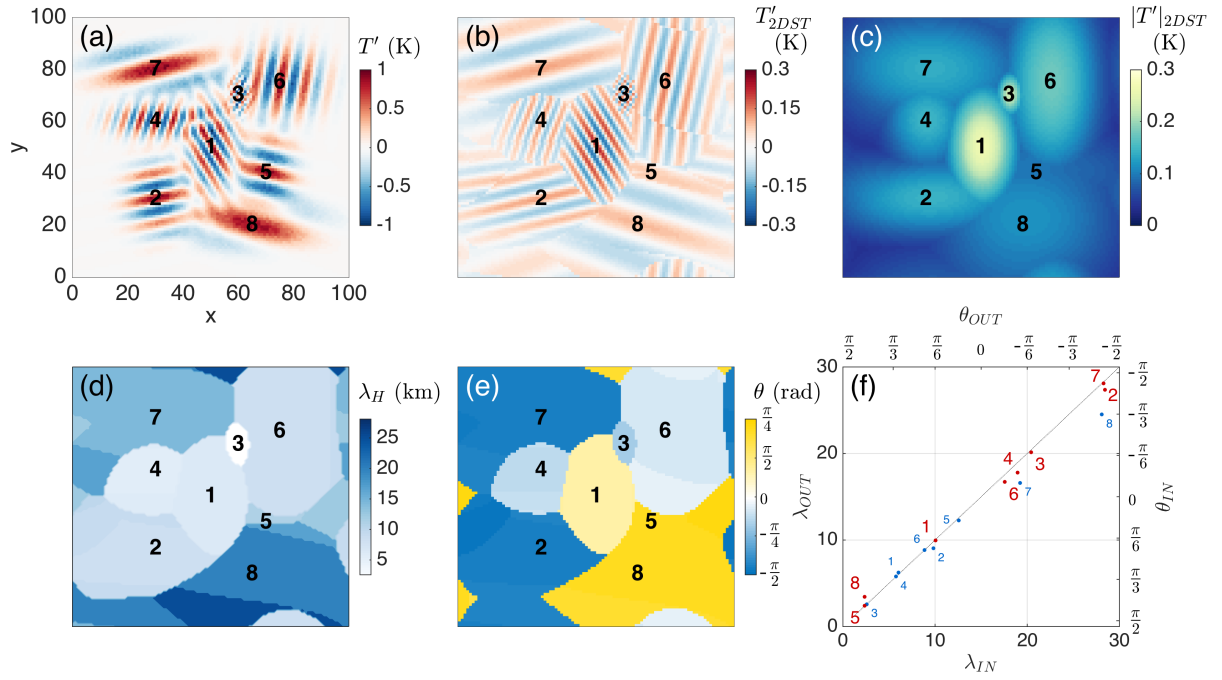

**Figure 2.** The specified wave field (a), containing synthetic waves numbered 1 to 8, for which our two-dimensional Stockwell transform analysis has been performed. The “reconstructed” wave field  $T'_{2DST}$ , instantaneous underlying wave amplitudes  $|T'|_{2DST}$ , horizontal wavelengths  $\lambda_H$  and directions of propagation  $\theta$  (measured anticlockwise from the positive  $x$  direction) are shown in panels (b), (c), (d), and (e) respectively. Distances and wavelengths have units of kilometres and amplitudes have units of Kelvin. Panel (f) compares input and measured wavelengths (blue numbered dots) and input and measured propagation angles (red numbered dots) for the eight synthetic waves. The dashed grey line in (f) shows 1:1 correspondence.

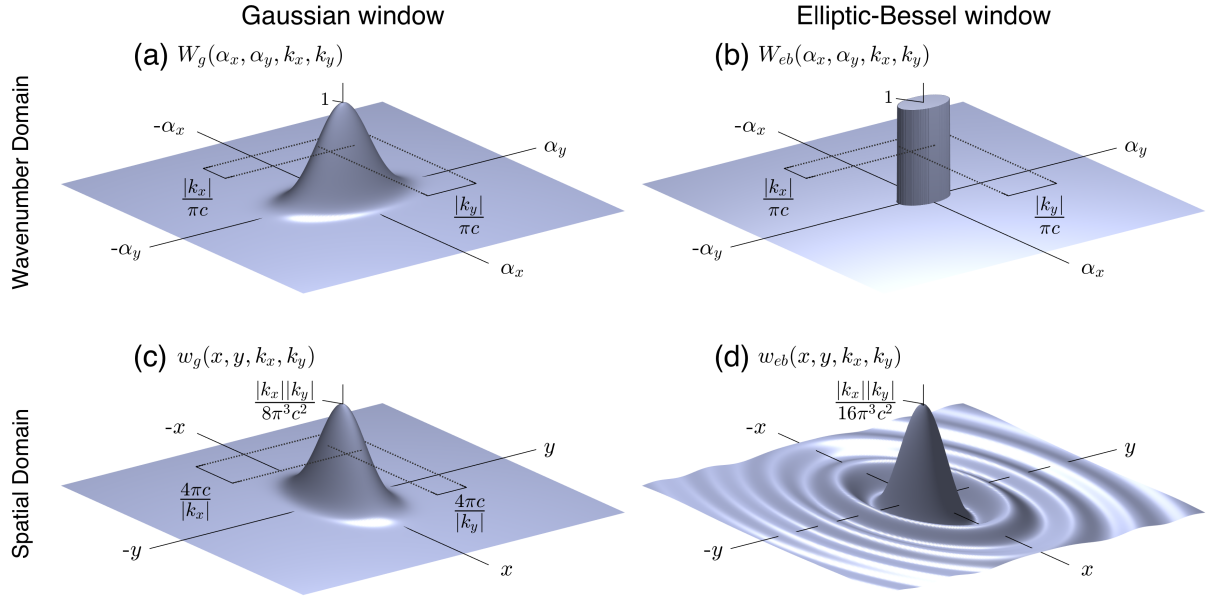

**Figure 3.** Panel (a) shows the central regions of the 4-D wavenumber-domain (top row) and spatial-domain (bottom row) forms of the traditional Gaussian (red), elliptical (blue), and sine-new Elliptic-Bessel (green) windowing functions used for wavenumber localisation in the 2DST in Seet two-dimensional Stockwell transform for arbitrary wavenumbers  $k_x$  and  $k_y$  and scaling parameter  $c$ . The 2-D forms semi-major and semi-minor axes of the Gaussian, elliptical, and sine windows are shown. Elliptic-Bessel window in (b) are equal to the corresponding standard deviations of the Gaussian window in (c) and (d) respectively, where  $\alpha_x$  and  $\alpha_y$  are translations in both windows have a central value equal to unity. In the spectral spatial domain, Dashed ellipses, the Elliptic-Bessel window in (b), (c) and (d) show the location has a central value equal to half that of the  $1\sigma$  contour of the 2-D Gaussian windowing function window in Eq(c), both of which have spatial integrals equal to unity. ?? for arbitrary wavenumbers  $k_x$  and  $k_y$ . For details, see text.



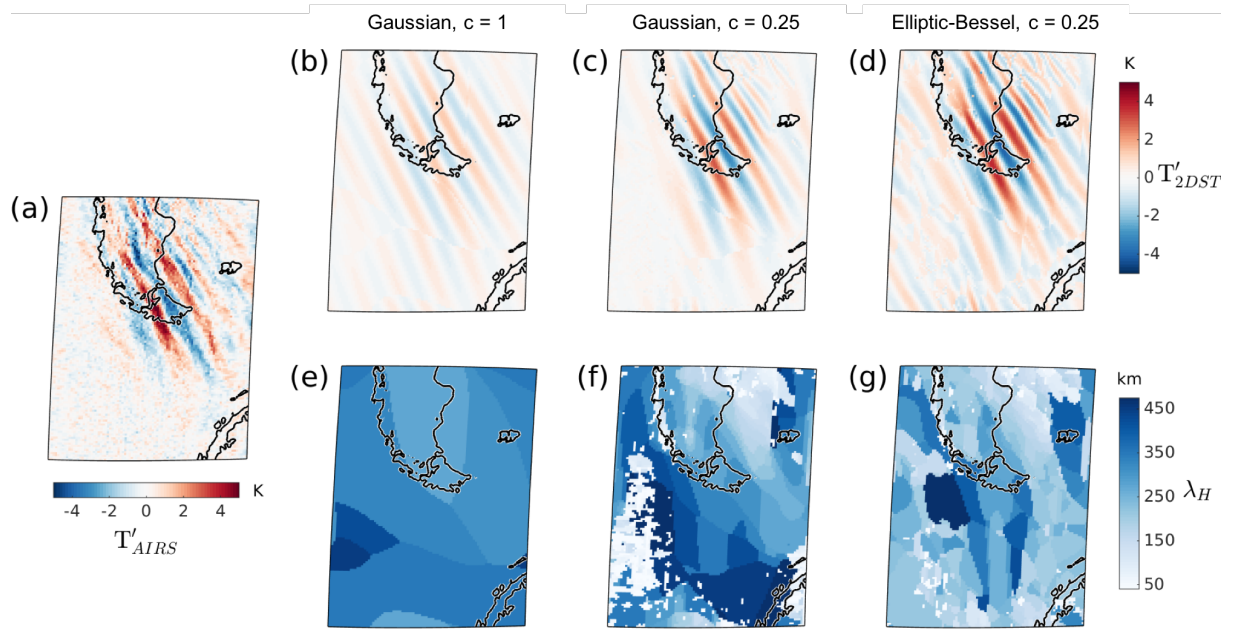

**Figure 4.** Orthographic projection of AIRS brightness temperature perturbations  $T'_{AIRS}$  (a) from a granule over the Southern Andes at 0530 UTC on 24<sup>th</sup> May 2008, with “reconstructed” temperature perturbations  $T'_{2DST}$  and horizontal wavelengths  $\lambda_H$  computed using the 2DST with three different windowing approaches: (b,e) a Gaussian window with scaling parameter  $c = 1$ , (c,f) a Gaussian window with  $c = 0.25$ , and (d,g) ~~an elliptical~~ the Elliptic-Bessel window with  $c = 0.25$ .

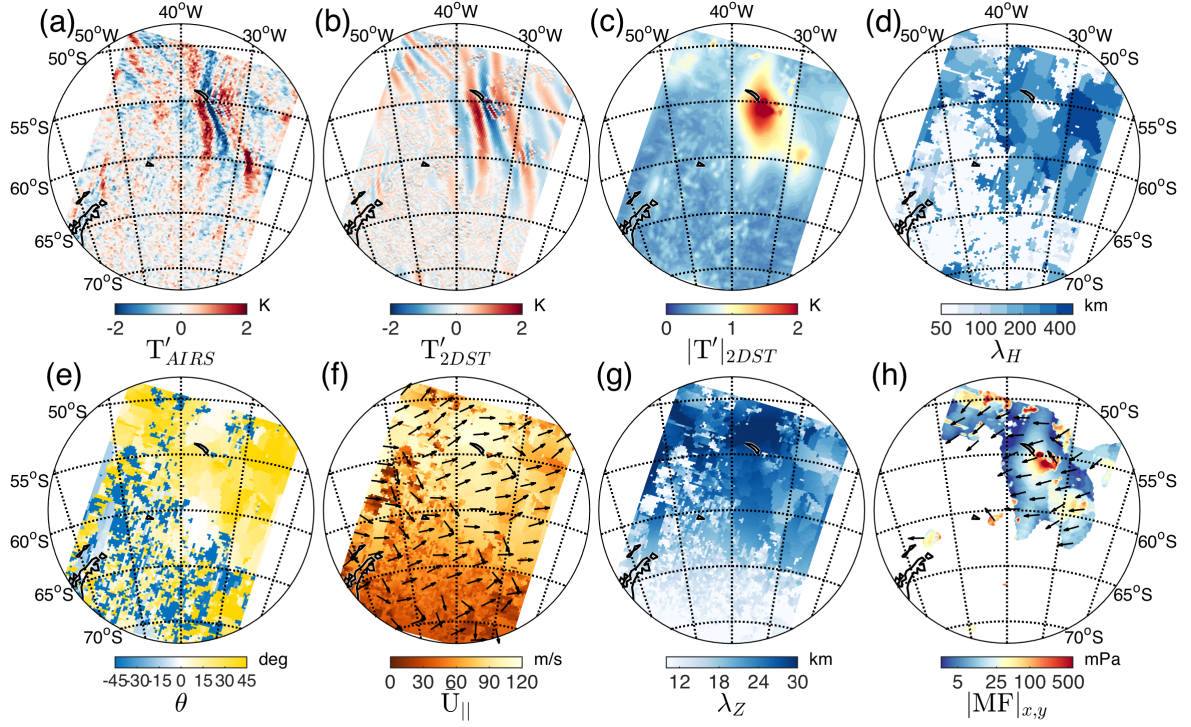

**Figure 5.** Orthographic projections of a granule of AIRS brightness temperature measurements  $T'_{AIRS}$  (a) over South Georgia at around 0300 UTC on 6<sup>th</sup> September 2003 and selected outputs (b–e) of our 2DST analysis (b–e) using the Elliptic-Bessel window. This granule was also analysed by Alexander et al. (2009) (their Fig. 3) using a one-dimensional S-Transform method. The 2DST outputs shown here are reconstructed brightness temperature perturbations  $T'_{2DST}$  (b), instantaneous underlying wave amplitude-amplitudes  $|T'|_{2DST}$  (c), wavelength-wavelengths  $\lambda_H$  (d) and wave propagation direction-directions  $\theta$  (e) in degrees anticlockwise from east. Also shown are mean wind speed parallel to the horizontal wavenumber vectors  $\bar{U}_{||}$  (f) from ECMWF operational analyses at  $z \approx 40$  km, vertical wavelength-wavelengths  $\lambda_Z$  (g) and the magnitude of the horizontal component of vertical momentum flux  $|MF|_{x,y}$  (h). Black arrows in (f) and (h) show the horizontal direction of  $\bar{U}_{||}$  and  $|MF|_{x,y}$  respectively. For details, see text.

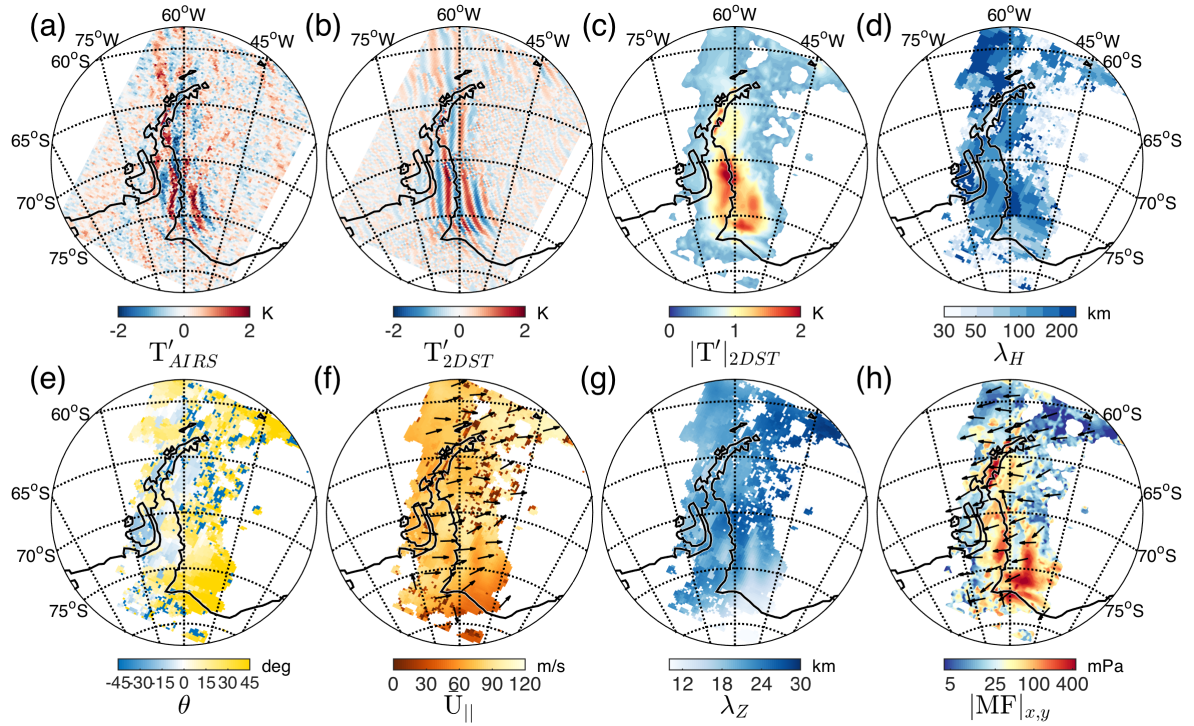

**Figure 6.** As Fig. 5, but for AIRS measurements over the Antarctic Peninsula around 0400 UTC on 2<sup>nd</sup> August 2010. These measurements were also analysed by Hoffmann et al. (2014, their Fig. 8) using a one-dimensional S-Transform method. Here, regions in panels (c–h) where the instantaneous underlying wave amplitude  $|T'|_{2DST}$  is less than one standard deviation below the mean are coloured white.

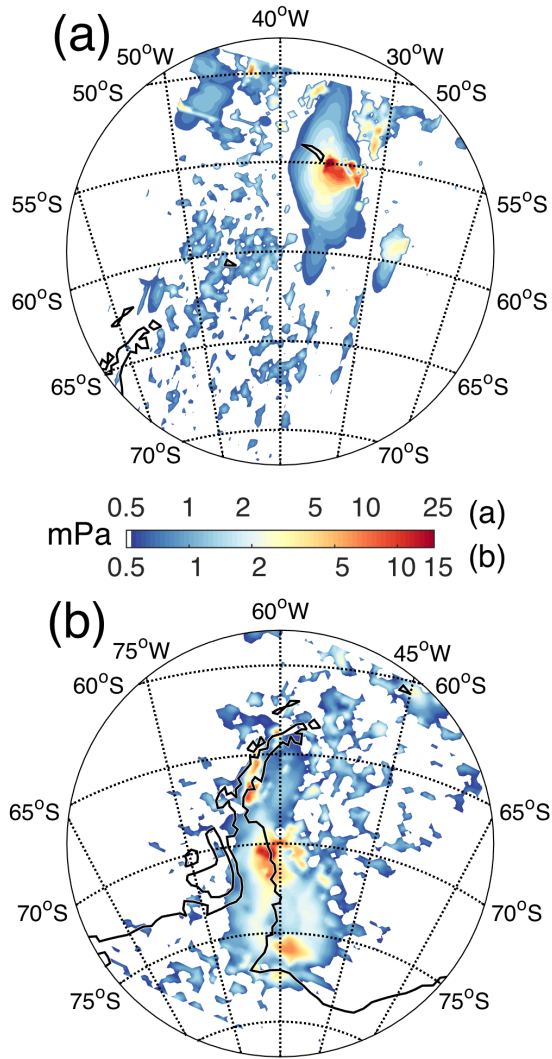

**Figure 7.** As Figures 5h and 6h but for estimates of the magnitude of gravity wave momentum flux over South Georgia (a) and the Antarctic Peninsula (b) calculated without correcting for attenuation of wave amplitude as discussed in Sect. 5. Momentum fluxes less than 0.5 mPa are coloured white.
