# Supplementary material for: A two-dimensional Stockwell Transform for gravity wave analysis of AIRS measurements
Source: Copernicus journal article supplement (doi:10.5194/amt-2015-383), 2016-01-18
Supplement: Supplementary file [file amt-2015-383-AC3-supplement.pdf]

# Correction to authors' response to Anonymous Reviewer #1 : A two-dimensional Stockwell Transform for gravity wave analysis of AIRS measurements *doi:10.5914/amt-2015-383*

Neil P Hindley<sup>1</sup>

<sup>1</sup>Centre for Space, Atmosphere and Ocean Science, University of Bath, UK

Correspondence to: Neil Hindley (n.hindley@bath.ac.uk)

We would like to submit a correction to our response to Anonymous Reviewer #1 for the manuscript *amt-2015-383*.

1. The axes of Fig. R1 are labelled incorrectly. The correctly labelled figure is shown below:

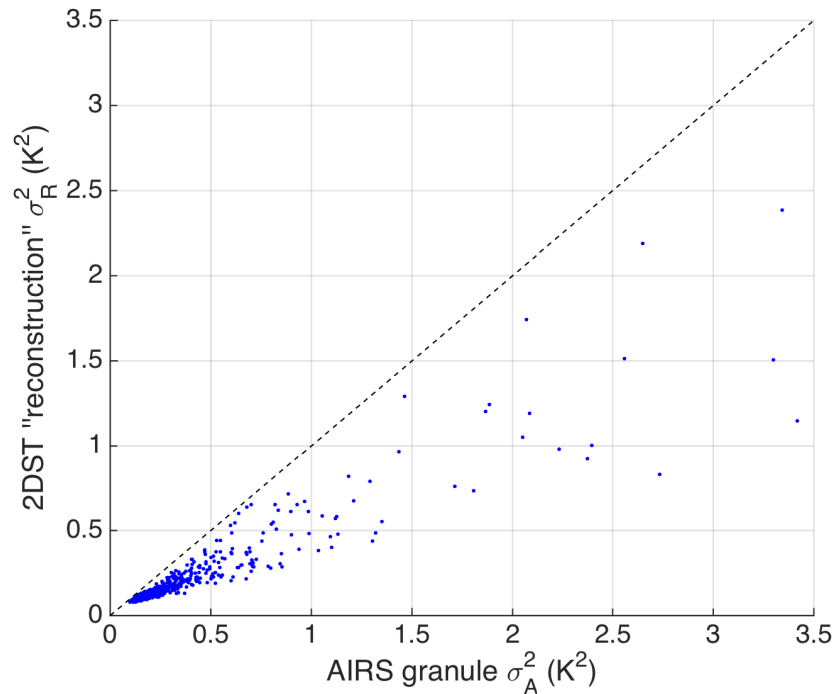

**Figure R1.** Scatter plot (blue dots) of total brightness temperature perturbation variance of AIRS granules  $\sigma_A^2$  globally at  $\sim 41$  km from June-August 2010 against temperature variance of “reconstructed” temperature perturbations using a two-dimensional Stockwell transform analysis method. The black dashed line shows where  $\sigma_A^2 = \sigma_R^2$ .
